# Supplementary material
Source: PubMed Central journal article supplement (PMC7357470)
Supplement: AEM.00731-20-s0001.pdf [file AEM.00731-20-s0001.pdf]

1 **SUPPLEMENTAL MATERIAL**

2 **Histone-like nucleoid-structuring protein (H-NS) paralogue**  
3 **StpA activates the type I-E CRISPR-Cas system against**  
4 **natural transformation in *Escherichia coli***

5

6 **Running title: StpA regulates the type I-E CRISPR-Cas system**

7

8 Dongchang Sun<sup>\*#</sup>, Xudan Mao<sup>#</sup>, Mingyue Fei, Ziyang Chen, Tingheng Zhu, Juanping

9 Qiu

10

11 College of Biotechnology and Bioengineering, Zhejiang University of Technology,

12 Hangzhou, Zhejiang 310014, China

13

14

15

16

17

18

19

20 <sup>\*</sup>Corresponding authors: [sundch@zjut.edu.cn](mailto:sundch@zjut.edu.cn)

21 <sup>#</sup> The two authors contributed equally to this work

22 Tel/Fax: +86 0571 88320057

23

24

## 1 SUPPLEMENTAL MATERIALS AND METHODS

2

### 3 1. Construction of *E. coli* mutants

4 *E. coli* mutants were constructed by using the  $\lambda$ -RED recombination system that had  
5 been constructed in the temperature sensitive plasmid pKD46 (1). To induce the  $\lambda$ -RED  
6 system, arabinose (30 mM) was added to the *E. coli* pKD46 culture at an OD<sub>600</sub> of 0.2.  
7 Chemical competent cells were prepared when the cell culture was grown to an OD<sub>600</sub>  
8 of 0.4. The DNA template containing an antibiotic resistant gene (Cm<sup>R</sup> or Kan<sup>R</sup>) from  
9 either pKD3 or pKD4 for double crossover was PCR amplified with a pair of primers  
10 (P<sub>01</sub>-P<sub>02</sub> for inactivating *stpA* or P<sub>03</sub>-P<sub>04</sub> for inactivating *hns*) containing short  
11 homologous arms. The *stpA* and *hns* null mutants were checked by using colony PCR  
12 with primer pairs P<sub>05</sub>-P<sub>06</sub> for  $\Delta$ *stpA* and P<sub>07</sub>-P<sub>08</sub> for  $\Delta$ *hns*. The temperature sensitive  
13 plasmid pCP20 was transformed into the mutant for eliminating the antibiotic resistance  
14 gene in the genome. All primers are shown in Table 2.

15

### 16 2. Plasmid construction

17 The plasmid pCR1 was constructed by inserting the chemically synthesized DNA  
18 fragment (CR1) with four protospacer adjacent motif (PAM)-containing DNA regions,  
19 that can be recognized by the CRISPR-Cas system of *E. coli*, into the vector pUC57 at  
20 the *Hind* III and *EcoR* I sites. DNA synthesis and cloning were performed by  
21 GENEWIZ Biotech Co., LTD. The complete sequence of pCR1 was provided in the  
22 section of DNA SEQUENCE INFORMATION at the end of the file.

1 To construct pGLO-P<sub>cas</sub>-gfp for monitoring transcription of *cas* operon, the promoter of  
2 the *cas* operon was fused with the green fluorescence protein (GFP) encoding gene.  
3 The fragment of P<sub>cas</sub> was amplified from *E.coli* genome with primer pairs P<sub>11</sub> and P<sub>12</sub>.  
4 The linearized vector, that was obtained by PCR amplification of pGLO with primer  
5 pairs P<sub>09</sub> and P<sub>10</sub>, was recombined with the above fragments by using the One Step  
6 Cloning Kit (Qingke Biotech Co., LTD).

7 To construct pGLO-P<sub>rscA</sub>-gfp for checking transcriptional activity of a promoter known  
8 to be regulated by H-NS and StpA, the fragment of P<sub>rscA</sub> was amplified from *E.coli*  
9 genome with primer pairs P<sub>15</sub> and P<sub>16</sub>. The linearized vector, that was obtained through  
10 PCR amplification of pGLO with primer pairs P<sub>13</sub> and P<sub>14</sub>, was recombined with the  
11 above fragments by using the One Step Cloning Kit (Qingke Biotech Co., LTD).

12 The plasmid pGLO-P<sub>cas</sub>\*-gfp carrying mutations in the putative DNA binding site (DBS)  
13 for H-NS/StpA was constructed to identify the DBS for H-NS/StpA regulation in P<sub>cas</sub>.  
14 Mutations in DBS was achieved by using site-directed mutagenesis with pGLO-P<sub>cas</sub>-  
15 gfp as the template and the primer pair P<sub>25</sub>-P<sub>26</sub> for amplification.

16 To construct pSUStpA and pSUHNS for ectopic expressing StpA and H-NS on plasmid,  
17 DNA fragments containing *stpA* and *hns* together with their original promoters were  
18 amplified with primer pairs P<sub>17</sub>-P<sub>18</sub> and P<sub>21</sub>-P<sub>22</sub> from the *E.coli* genome. The linearized  
19 vectors, that was obtained by PCR amplification of pSU19 with primer pairs P<sub>19</sub>-P<sub>20</sub>  
20 and P<sub>23</sub>-P<sub>24</sub>, were recombined with the above fragments by using the One Step Cloning  
21 Kit (Qingke Biotech Co., LTD).

1 To construct pSU-P<sub>BAD</sub>-*gfp* which expressed the green fluorescence gene with an  
2 arabinose-inducible promoter P<sub>BAD</sub>, the fragment containing *gfp* together with P<sub>BAD</sub> was  
3 amplified with primer pairs P<sub>30</sub>-P<sub>31</sub> from pGLO-*gfp*. The linearized vector, that was  
4 obtained by PCR amplification of pSU19 with primer pairs P<sub>32</sub>-P<sub>33</sub>, was recombined  
5 with the above fragment by using the One Step Cloning Kit (Qingke Biotech Co., LTD).  
6 To construct pSU-P<sub>BAD</sub>-*stpA* and pSU-P<sub>BAD</sub>-*hns*, fragments containing *stpA* and *hns*  
7 were amplified from *E.coli* genome with primer pairs P<sub>36</sub>-P<sub>37</sub> and P<sub>38</sub>-P<sub>39</sub>. The  
8 linearized vector, that was obtained by PCR amplification of pSU19 with primer pairs  
9 P<sub>35</sub>-P<sub>36</sub>, was recombined with the above fragments by using the One Step Cloning Kit  
10 (Qingke Biotech Co., LTD).

11

### 12 **3. Quantification of crRNA with RT-qPCR**

13 Overnight-grown *E. coli* culture (1 ml) was precipitated and the cell pellet was  
14 resuspended in 1 ml RNA trizol (TransGen Biotech Co., LTD). The cell resuspension  
15 was mixed thoroughly with 0.2 ml chloroform. After incubation at the room  
16 temperature for 3 minutes, the mixture was centrifugated at 10, 000 rpm for 15 minutes.  
17 The upper layer of the mixture was transferred to the RNA spin column for purifying  
18 the total RNA, which was retained in the eluate. Total RNA in the eluate was transferred  
19 to a miRNA spin column, in which the resin matrix had high affinity for small RNA  
20 (sRNA). The attached sRNA on the resin matrix was washed with ethanol and the  
21 washing buffer provided in the EasyPure<sup>®</sup> miRNA Kit (TransGen Biotech Co., LTD).  
22 Then, 30 µL RNase-free water was added to the miRNA spin column to dissolve sRNA  
23 which was subsequently examined by gel electrophoresis before being stored at -80°C.

1 For quantifying crRNA, the first strand of the corresponding cDNA was obtained with  
2 the *TransScript*<sup>®</sup> miRNA First-Strand cDNA Synthesis SuperMix Kit (TransGen  
3 Biotech Co., LTD). The reaction system (10  $\mu$ l) for reverse transcription was as follows:  
4 sRNA (0.2 mg ml<sup>-1</sup>) 4.5  $\mu$ l, *TransScript* miRNA RT Enzyme Mix 0.5  $\mu$ l, 2  $\times$  TS miRNA  
5 Reaction Mix 5  $\mu$ l. The reaction system was left at 37°C for an hour before inactivation  
6 of the RT Enzyme Mix at 85°C for 5 seconds. During reverse transcription, the DNA  
7 fragment (GATCGCCCTTCTACGTCGTATCGTCATCTGACCGTTATCGCTGCAC  
8 GTTTTTTTTTTTTTTTTTTTTT) was simultaneously added to the 3' terminus of the  
9 cDNA.

10 To quantify sRNA transcripts, real-time PCR was performed with a pair of primers (P<sub>28</sub>  
11 and P<sub>29</sub> for crRNA, P<sub>27</sub> and P<sub>29</sub> for tRNA) that were complementary to the target cDNA  
12 and the added 3' tail respectively, by using the program as follows: 94°C, 30 seconds;  
13 94°C, 5 seconds; 57°C, 15 seconds; 72°C, 10 seconds; 72.5°C, 5 seconds for melt curve  
14 evaluation; recycle number for 40 times. PCR products were examined by using 2%  
15 agar gel electrophoresis.

16

#### 17 **4. Drop-planting**

18 Drop planting was performed according to a documented method (2). The overnight  
19 grown culture of *E. coli* carrying pCR1 or pDsRED was serially diluted with LB  
20 medium. An aliquot of 10  $\mu$ l of the diluted cell suspension was dispensed into LB-agar  
21 plate supplemented with 100  $\mu$ g ml<sup>-1</sup> ampicillin. After drops on the agar dried, the petri  
22 plates were inverted and incubated at 30 °C for 24-48 hours.

1

## 2 **5. Plasmid loss assay in transformants**

3 After natural transformation of *E. coli*, transformant colonies were further grown in LB  
4 broth or on LB-agar plates. Cell growth in LB broth was measured in a Spectrumlab  
5 S23A Spectrophotometer at 600 nm. To evaluate plasmid loss in transformants, bacteria  
6 grown in LB broth were streaked on plates or serial diluted before drop plating (2). To  
7 quantify the rate of plasmid loss, numbers of viable counts on LB-agar plates with and  
8 without ampicillin ( $100 \mu\text{g ml}^{-1}$ ) were measured by using the track-dilution cfu  
9 enumeration technique (3).

10

## 11 **6. Chemical Transformation**

12 Overnight grown *E.coli* cell culture (1 ml) was inoculated into 50 ml LB medium and  
13 incubated at 30°C with shaking to an optical density at 600 nm ( $\text{OD}_{600}$ ) of 0.4. The cell  
14 pellet, which had been collected by centrifugation and washed twice with 10 ml 100  
15 mM  $\text{CaCl}_2$  solution on ice, was resuspended in 500  $\mu\text{l}$  of 100 mM  $\text{CaCl}_2$  solution  
16 supplemented with 10% ( $\text{v v}^{-1}$ ) glycerol and restored at -80°C. Plasmid pDsRED or  
17 pCR1 was added to 50  $\mu\text{l}$  of the competent cell suspension to a final concentration of ~  
18  $10 \mu\text{g ml}^{-1}$ , which was placed on ice for 30 minutes before a heat shock at 42°C for 90  
19 seconds. Then, the cell suspension was placed on ice for ~ 1 minute, followed by the  
20 addition of 0.5 mL LB. Transformed cells in LB medium were further incubated at 30°C  
21 for 2 hours before being spread on LB-agar plates containing ampicillin at a

1 concentration of 100  $\mu\text{g ml}^{-1}$ . The number of transformants on plates were counted and  
2 transformation efficiency was calculated as the number of transformants per  $\mu\text{g}$  plasmid.

3

#### 4 **7. Protein isolation and purification**

5 *E.coli* BL21 containing pET28a-StpA-His/pET28a-HNS-His was incubated in 50 ml  
6 LB medium at 37 °C with shaking. To induce the expression of StpA-His/HNS-His,  
7 lactose (0.4%) was added to the cell culture at an OD<sub>600</sub> of 0.4 and further incubated for  
8 6 hours. *E. coli* mutants ( $\Delta\text{stpA}$ ,  $\Delta\text{hns}$  and  $\Delta\text{hns } \Delta\text{stpA}$ ) and their wildtype parent were  
9 grown to the stationary phase in LB broth. Cell pellets were collected by centrifugation  
10 and washed with the phosphate-buffered saline (PBS) buffer before being resuspended  
11 in 5 mL cold PBS buffer. To obtain total proteins, the cell resuspension was sonicated  
12 on ice for 20 min (9 s sonication, 9 s interval) at 33% amplitude. StpA-His/HNS-His  
13 was purified from total proteins with Tagged Protein Purification Kit (Soluble Protein)  
14 Kit (Beijing ComWin Biotech Co., Ltd).

15

#### 16 **8. Western blot assay**

17 For determination of expression level of StpA/H-NS in cells, total proteins were taken  
18 from cultures that had been grown to the stationary phase (10-hour in LB medium and  
19 24-hour in M9 medium), and resuspended in the PBS buffer. Samples were subjected  
20 to SDS-PAGE (12% polyacrylamide) before being blotted onto a 0.1  $\mu\text{m}$  nitrocellulose  
21 transfer membrane (Bio-rad). The chemically synthesized peptide  
22 CAAPRAGKKRQPR (Hangzhou HuaAn Biotechnology Co., Ltd.) was used to raise

1 the StpA antibody in rabbits which were reviewed and approved by the Animal  
2 Research Committee at Zhejiang University of Technology. The polyclonal StpA  
3 antibody was used as the primary antibody. HRP-conjugated Goat anti-Rabbit IgG was  
4 used as the secondary antibody at a dilution of 1:2000. The treatment of the membrane  
5 was as described in Sambrook and Russell (4).

6

### 7 **9. Quantification of transcription of *cas* genes with GFP**

8 Cell growth was monitored spectrophotometrically at an optical density of 600 nm  
9 ( $OD_{600}$ ). Intensity of the culture fluorescence, as an indicator of transcription of  $P_{cas}$ ,  
10 was measured by the SpectraMax Gemini EM microplate reader with excitation and  
11 emission wavelengths at 395 and 509 nm respectively. Relative gene expression was  
12 calculated through dividing the intensity of the culture fluorescence by  $OD_{600}$ .

13

### 14 **10. Natural transformation of *E. coli hns stpA* carrying pSU- $P_{BAD}$ -*stpA***

15 All experiments were performed at 30 °C. The overnight-grown culture of *E. coli hns*  
16 *stpA* mutant carrying pSU- $P_{BAD}$ -*stpA* was added to 50 ml of  $1.5 \times$  LB medium with a  
17 ratio of 1: 50 ( $v v^{-1}$ ). After 24-hour incubation with shaking at a speed of 180 rpm, 2 ml  
18 of the cell culture was added to each glass tube which was supplemented without or  
19 with arabinose at concentrations of 0.5, 1 or 2 mM, followed by further incubation with  
20 shaking for 1 hour. After centrifugation at room temperature, 90% of the supernatant  
21 was discarded and the cell pellet was resuspended in the remaining 10% supernatant  
22 before adding the plasmid pCR1 to a final concentration of  $40 \mu g ml^{-1}$ . The mixture of



1 the cell culture and pCR1 was spread on 5% agar (Bacto Difco)- and ampicillin-  
2 containing ( $100 \mu\text{g ml}^{-1}$ ) plates as previously documented (5, 6), without or with  
3 arabinose at concentrations of 0.5, 1 or 2 mM. Plates were incubated for two days before  
4 counting the number of transformants. Transformation efficiency was calculated as the  
5 number of transformants per microgram plasmid DNA.

6

#### 7 **11. Quantification of cellular StpA:DNA ratio for transcriptional activation.**

8 The *in vivo* cellular StpA : DNA ratio for activating  $P_{cas}$  was estimated from the cell  
9 culture grown in M9 medium supplemented with 1 mM arabinose. The concentration  
10 of the purified StpA-His was  $\sim 0.25 \text{ mg ml}^{-1}$ , determined by the BCA protein assay kit  
11 (Beijing ComWin Biotech Co., Ltd). According to the Western Blot assay (FIG 5F),  
12 the concentration of StpA isolated from the cell culture grown in M9 medium was about  
13 10-fold lower than that of the purified StpA-His. Providing that the total protein from  
14 50 ml of the cell culture was resuspended in 5 ml of PBS buffer, the amount of StpA in  
15 the total protein was estimated to be  $0.025 \text{ mg ml}^{-1} \times 5 \text{ ml}$ . The viable cell density  
16 assayed by plate counting was  $\sim 5.4 \times 10^9 \text{ CFU ml}^{-1}$  in M9 medium. Accordingly,  
17 cellular concentration of StpA was about  $4.6 \times 10^{-16} \text{ g per cell}$ . Therefore, each cell  
18 contained  $1.8 \times 10^4$  StpA molecules. Providing the size of the *E. coli* genome is  $4.2 \times$   
19  $10^6 \text{ bp}$ , the StpA:DNA ratio was estimated to be  $\sim 1: 200$ .

20

1 **SUPPLEMENTAL RESULTS & DISCUSSION**

2 **1. PCR detection and western blot assay of *E.coli* mutants**

3 **A**

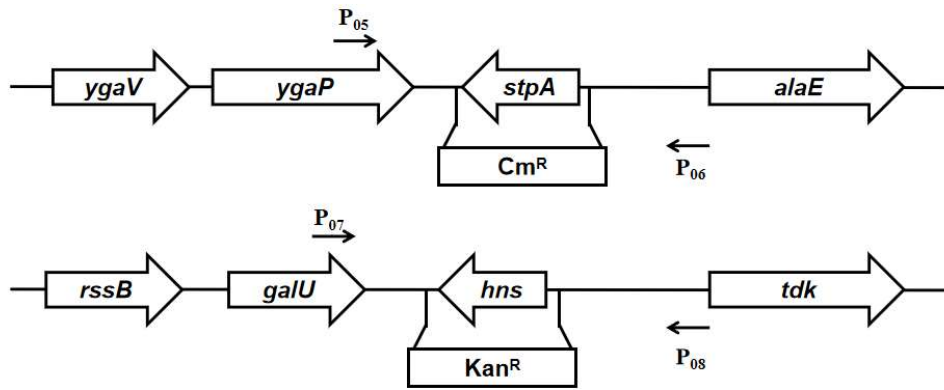

5 **B**

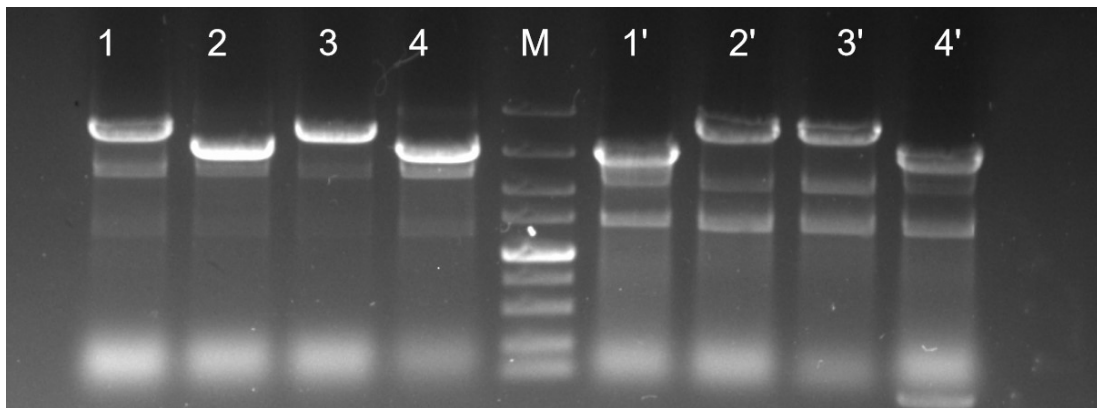

7 **C**

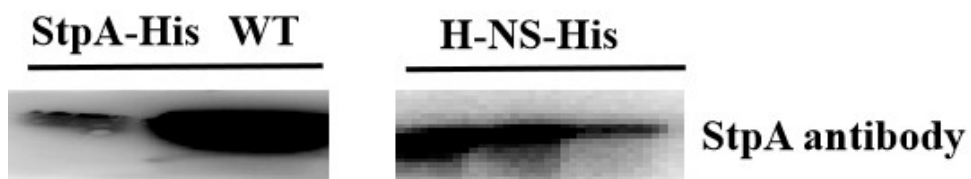

9 **D**

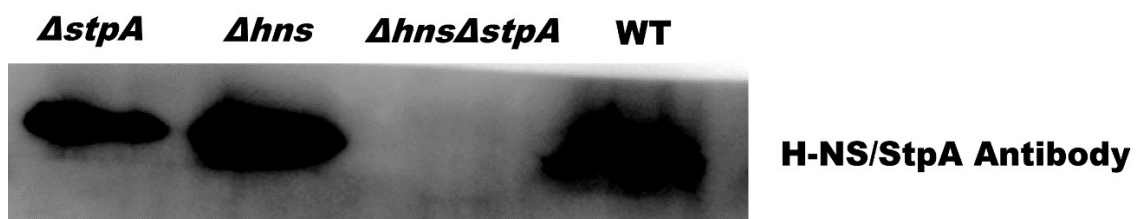

11

1 **FIG S1. Examination of *E. coli* mutants in this work.** (A) Genetic organization of  
2 the various chromosomal regions and location of cassette insertion mutants generated  
3 in this study (see accompanying TABLE S1). (B) Analysis of PCR fragments for  
4 confirmation of the structure of *E. coli* mutant strains. From left to right, each pair of  
5 channels compares wild type and mutant strains, as follows. Channel 1/1':  $\Delta stpA$  mutant;  
6 Channel 2/2':  $\Delta hns$  mutant; Channel 3/3':  $\Delta hns \Delta stpA$  mutant; Channel 4/4': wild type;  
7 M: 5000 DL marker (from the top down: 5 kb, 3 kb, 2 kb, 1.5 kb, 1 kb, 750 bp, 500 bp,  
8 250 bp, 100 bp). (C) Western blot assay was performed to determine interaction  
9 between the antibody, raised by a peptide derived from StpA, and purified StpA and H-  
10 NS. StpA-His: purified His-tagged StpA protein; H-NS-His: purified His-tagged H-NS  
11 protein; WT: Total protein isolated from the wildtype *E. coli* MC4100. (D) Total  
12 proteins were isolated from mutants ( $\Delta stpA$ ,  $\Delta hns$  and  $\Delta hns \Delta stpA$ ) and their wildtype  
13 parent grown to the stationary phase in LB broth. Western blot assay was performed  
14 with the antibody against H-NS or StpA. In *stpA* and *hns* single-deletion mutants, clear  
15 bands were detected, showing the presence of H-NS or StpA in these mutants. Whereas,  
16 no band was detected in the *hns stpA* null mutant, revealing that neither H-NS nor StpA  
17 was present in that mutant.

1 **TABLE S1 Prediction of the structure of *E.coli* mutant strains generated in this**  
 2 **work (see accompanying FIG S1C )**

3

| Channel <sup>a</sup> | Strain <sup>b</sup>              | Primer pair                                   | Size <sup>c</sup> (kb) |
|----------------------|----------------------------------|-----------------------------------------------|------------------------|
| 1                    | MC4100 <i>stpA::cat</i>          | P <sub>05</sub> +P <sub>06</sub> <sup>d</sup> | 3.557                  |
| 2                    | MC4100 <i>hns::kan</i>           | P <sub>05</sub> +P <sub>06</sub>              | 2.904                  |
| 3                    | MC4100 <i>stpA::cat hns::kan</i> | P <sub>05</sub> +P <sub>06</sub>              | 3.557                  |
| 4                    | MC4100                           | P <sub>05</sub> +P <sub>06</sub>              | 2.904                  |
| M                    |                                  | DL 5000 marker                                |                        |
| 1'                   | MC4100 <i>stpA::cat</i>          | P <sub>07</sub> +P <sub>08</sub> <sup>e</sup> | 2.913                  |
| 2'                   | MC4100 <i>hns::kan</i>           | P <sub>07</sub> +P <sub>08</sub>              | 3.702                  |
| 3'                   | MC4100 <i>stpA::cat hns::kan</i> | P <sub>07</sub> +P <sub>08</sub>              | 3.702                  |
| 4'                   | MC4100                           | P <sub>07</sub> +P <sub>08</sub>              | 2.913                  |

4

5 <sup>a</sup> Lane numbers refer to FIG S1.

6 <sup>b</sup> Strains and PCR primers are listed in Table 1 and 2.

7 <sup>c</sup> Sizes predicted on the basis of available DNA sequence information for PCR  
 8 fragments generated with primer pairs indicated in the third column.

9 <sup>d</sup> Primer pair for checking *stpA* null mutants.

10 <sup>e</sup> Primer pair for checking *hns* null mutants.

11 Sizes of bands detected on the agarose gels shown in FIG S1 are in good agreement  
 12 with the prediction.

13

1 **2. Morphology of *E. coli* mutants**

2

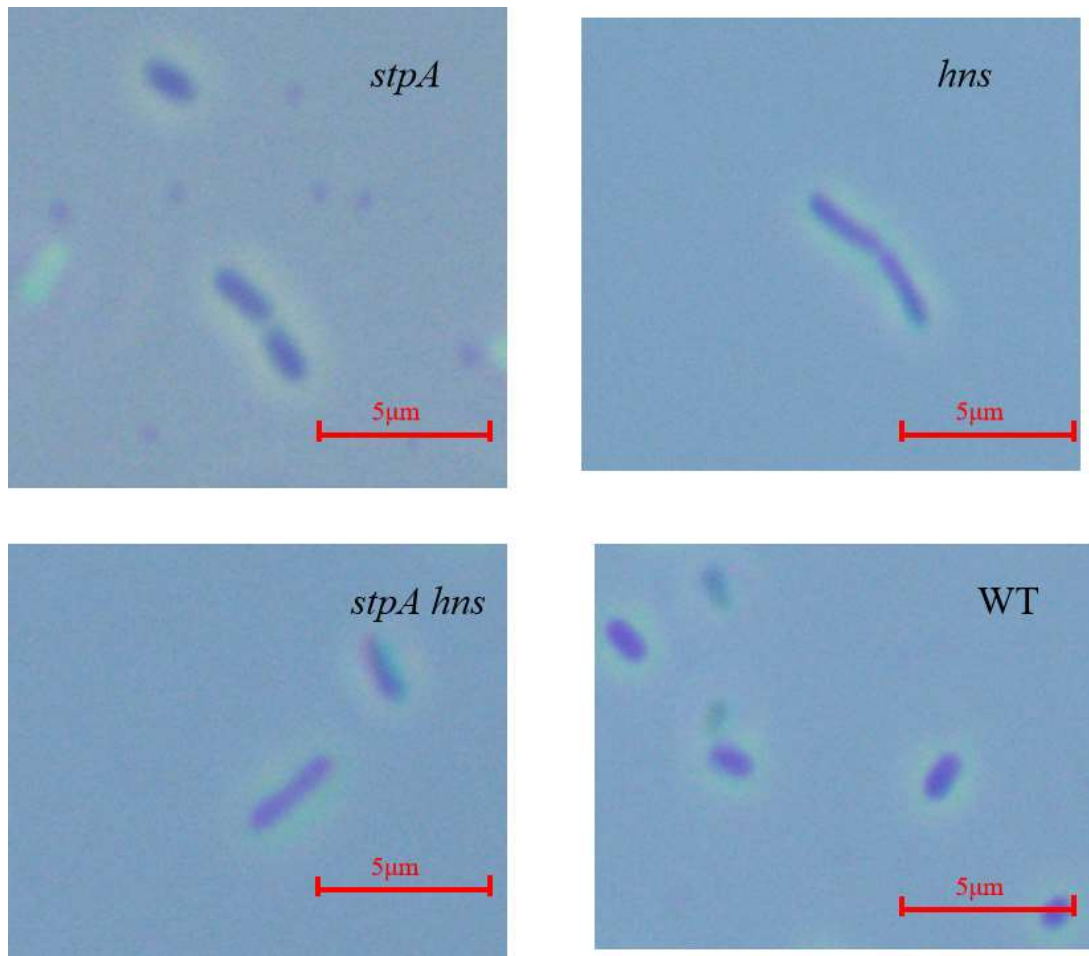

3

4

5 **FIG S2 Morphology of constructed *hns* and *stpA* null mutants.** Exponentially  
6 growing *E. coli* cells were observed with the phase-contrast microscope (1000 ×). The  
7 *hns* null mutant and the *stpA hns* null mutant were obviously longer than the *stpA* null  
8 mutant and their WT parent, in line with previous reports (7).

1 **3. Plasmids constructed in this study**

2

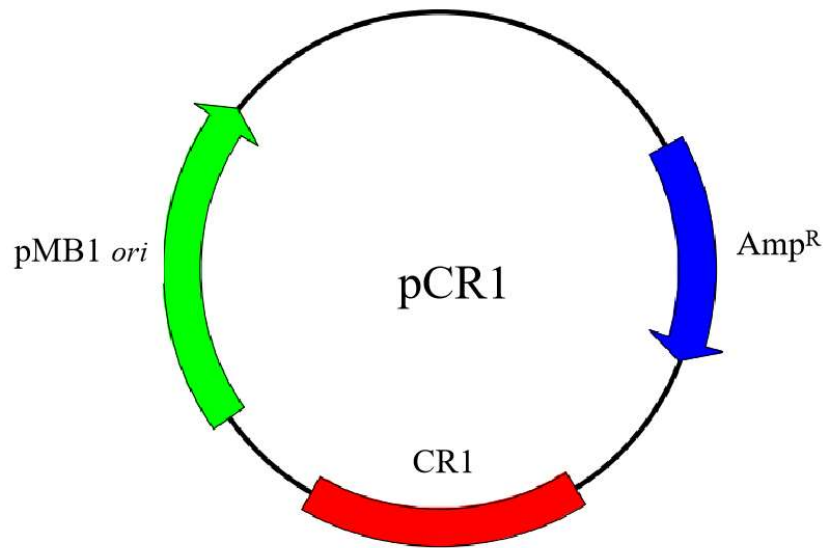

3

4

5 **Sequences of the CR1 fragment:**

6 5'-GAATTCGAGTTCCCCGCGCCAGCGGGGATAAA **AAG**CTTTCGCAGACGCG  
7 **CGGCGATACGCTCACGCA**GAGTTCCCCGCGCCAGCGGGGATAAA **AAGCAG**  
8 **CCGAAGCCAAAGGTGATGCCGAACACGCT**GAGTTCCCCGCGCCAGCGGGG  
9 ATAAA **AAG**GGCTCCCTGTCGGTTGTAATTGATAATGTTGA GAGTTCCCCGC  
10 GCCAGCGGGGATAAAA **AAG**TTTGATCGGGTCTGGAATTTCTGAGCGGTTCGC  
11 GAGTTCCCCGCGCCAGCGGGGATAAAA **AAG**AAGCTT-3'

12

13 **FIG S3 Schematic map and sequence of the CRISPR-Cas-targeted plasmid pCR1.**

14 PAM sequences are indicated with black letters on green background. Sequences of

15 protospacers are indicated with black letters on red background. The complete sequence

16 of pCR1 is available at the end of the file.

17

1 **A**

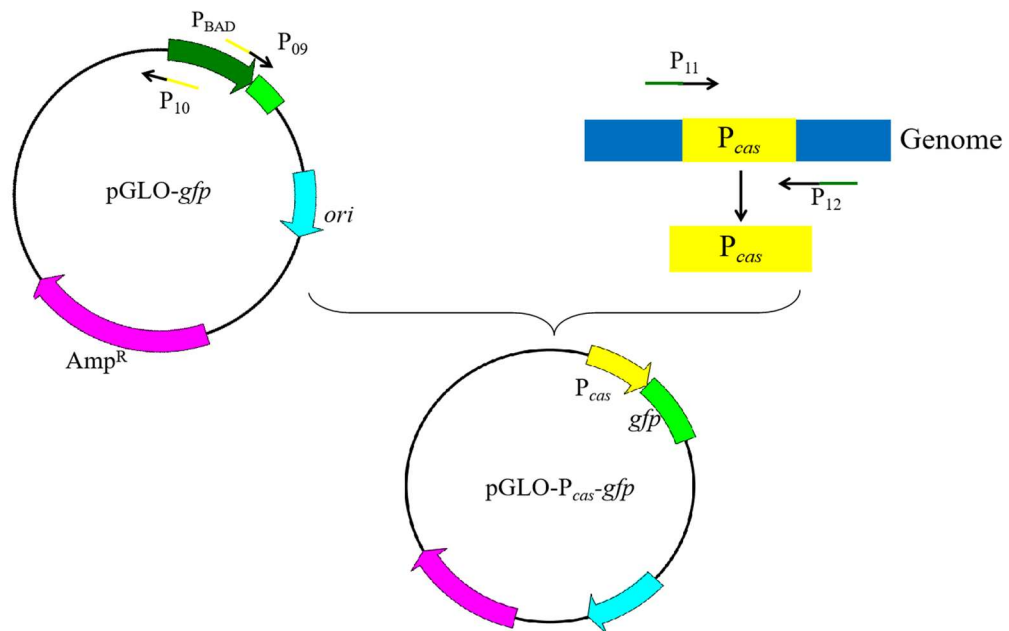

2

3 **B**

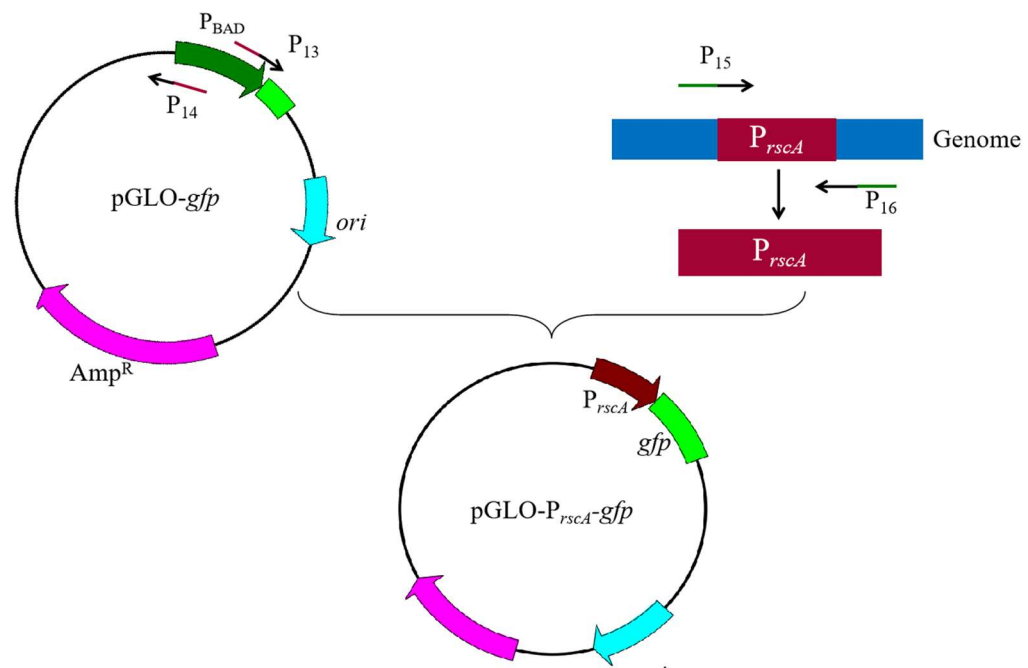

4

5

6 **FIG S4 Construction of reporter plasmids pGLO-P<sub>cas</sub>-gfp and pGLO-P<sub>rscA</sub>-gfp.**

7

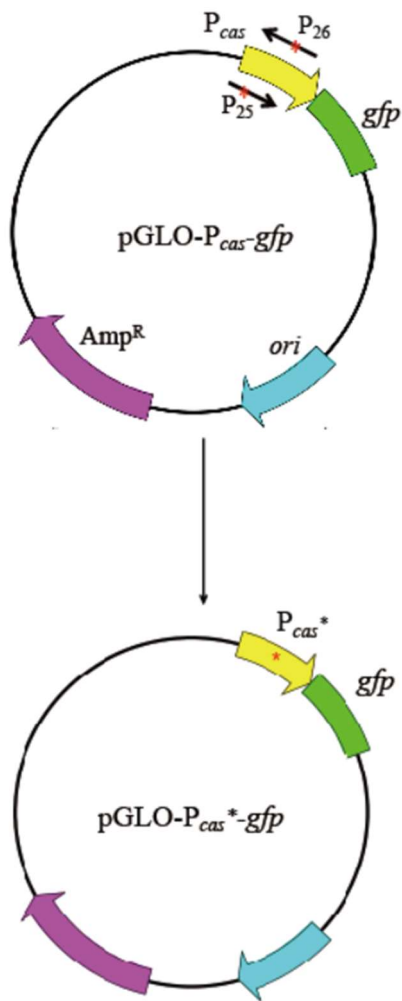

1

2

3 **FIG S5 Construction of pGLO- $P_{cas}^*$ -gfp for identifying DBS for H-NS/StpAin  $P_{cas}$ .**

4



1 **A**

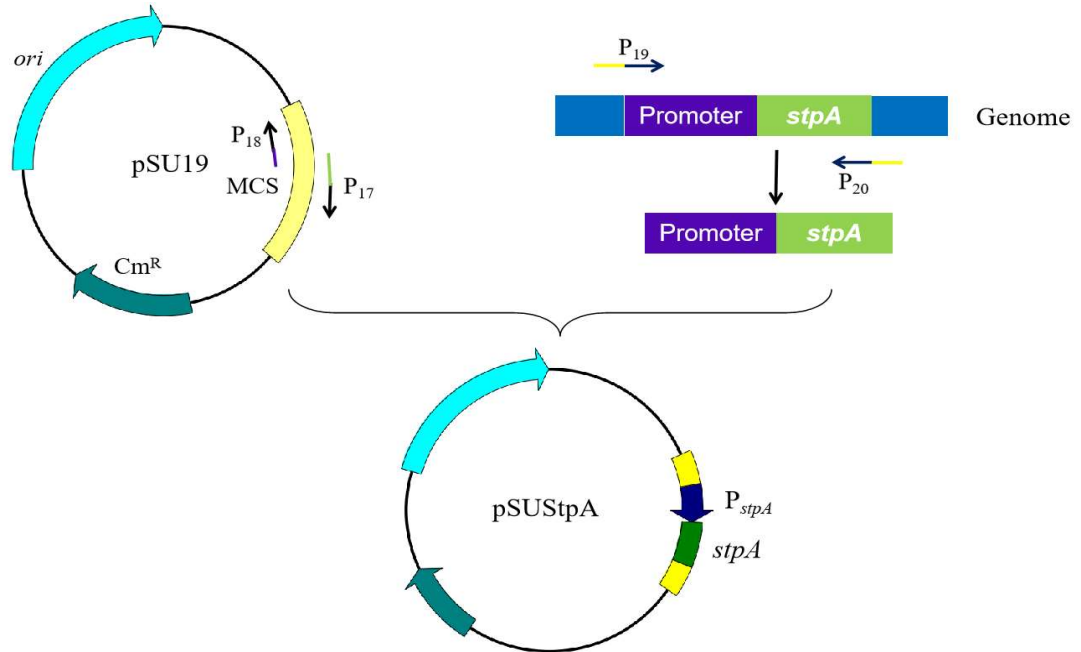

2

3 **B**

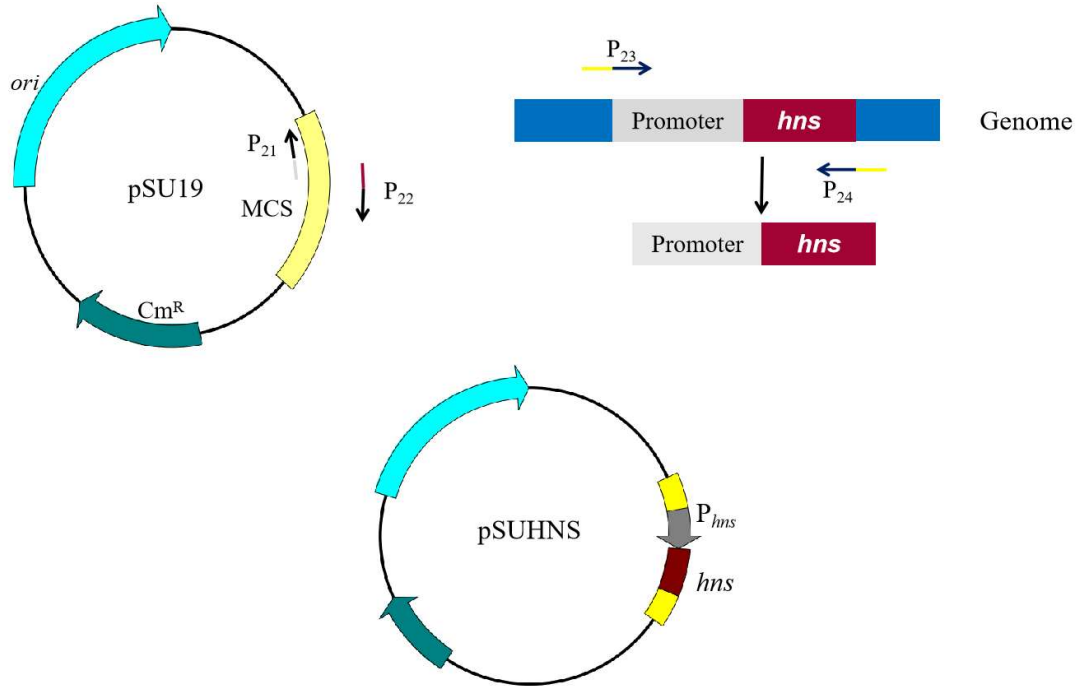

4

5

6 **FIG S6 Construction of pSUStpA and pSUHNS.**

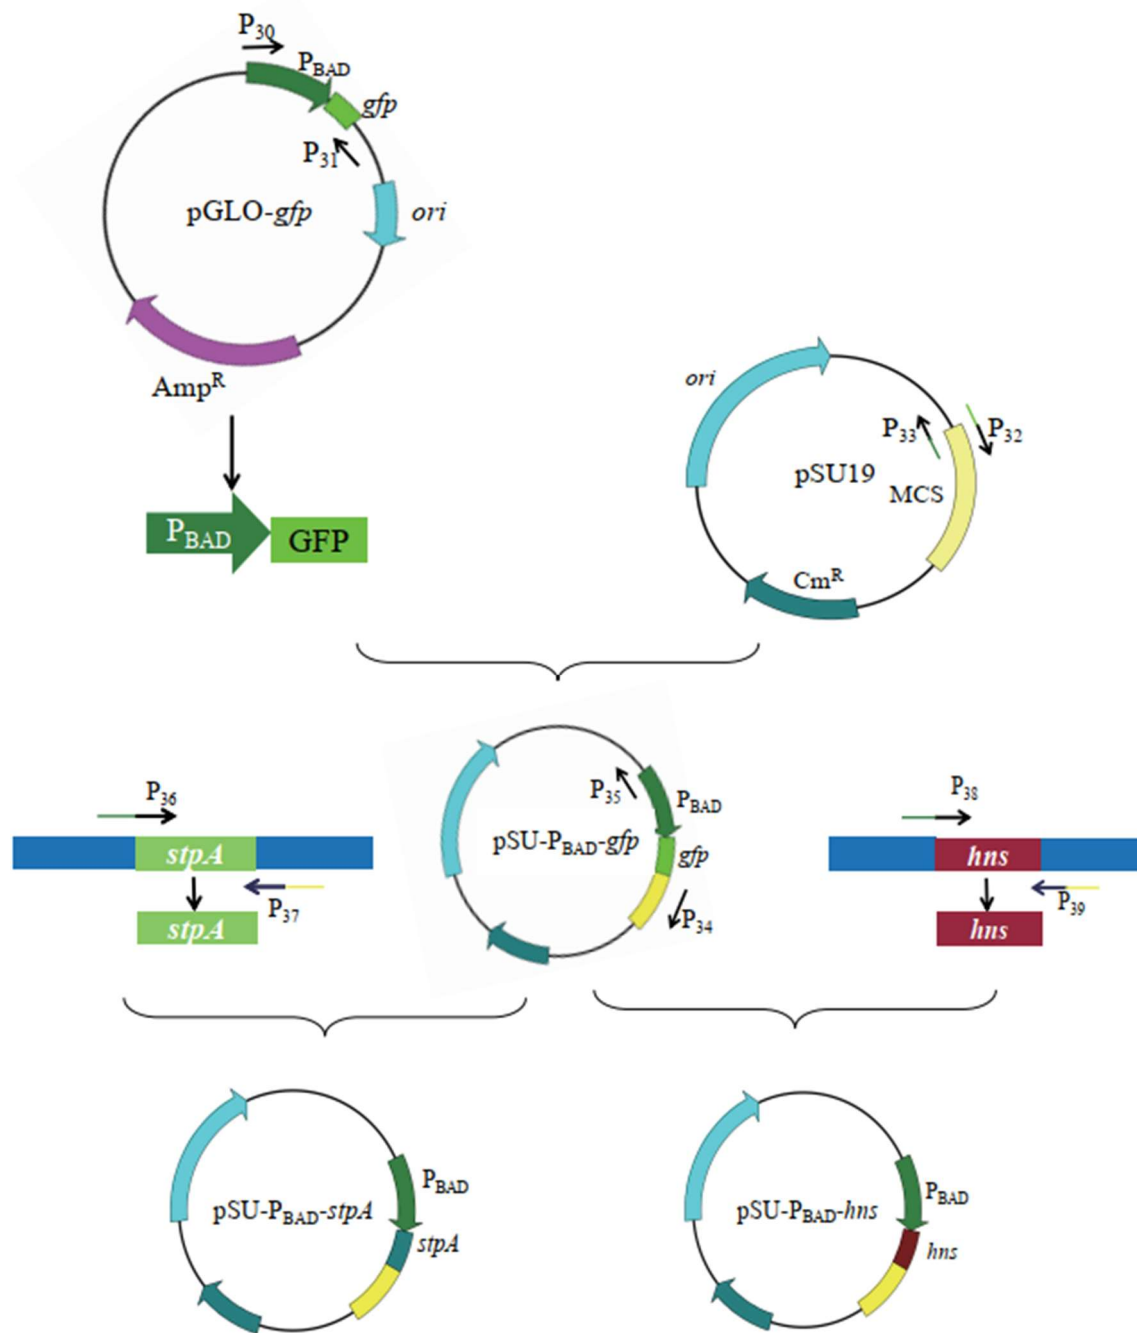

1

2

3 **FIG S7 Construction of pSU- $P_{BAD}$ -*stpA* and pSU- $P_{BAD}$ -*hns*.**

4

1 4. Growth of *E. coli* strains in the absence or presence of plasmid.

**A**

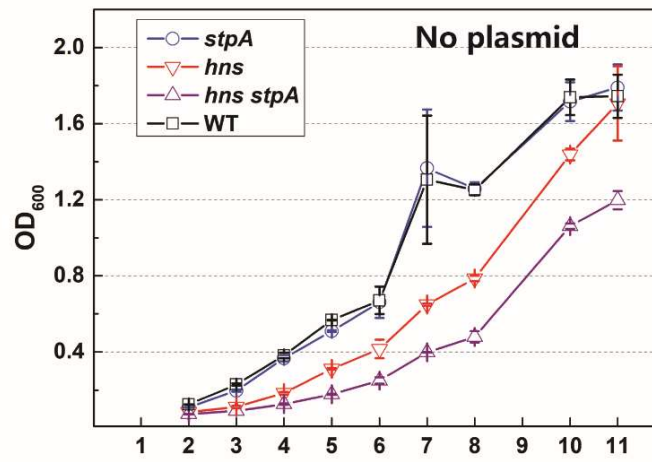

**B**

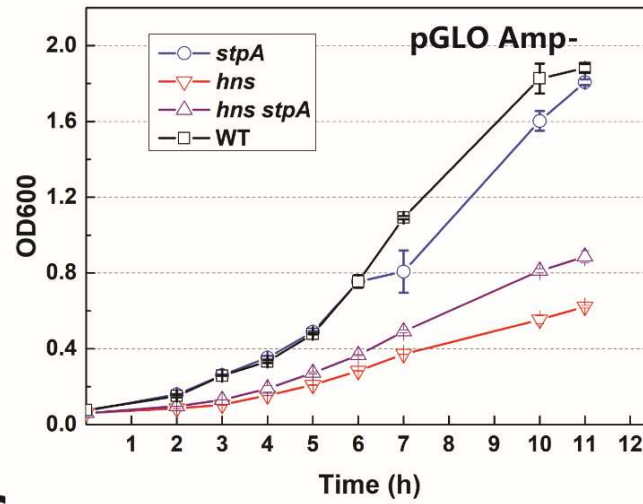

**C**

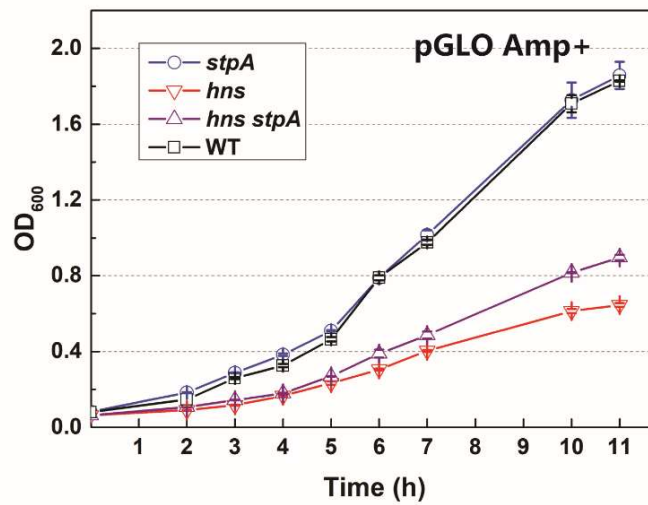

1 **FIG S8 Plasmid affects the growth of the *hns* null mutant.** In agreement with  
2 previous reports (8, 9), the *hns stpA* null mutant (purple line) grew obviously slower  
3 than the *hns* null mutant (red line) in LB broth (A). When a multi-copy-plasmid (pGLO-  
4 P<sub>cas</sub>) was transferred into these strains, growths of the *stpA* mutant, the *stpA hns* null  
5 mutant and their parent were not obviously affected in LB supplemented without (B)  
6 or with (C) ampicillin (100 µg ml<sup>-1</sup>). However, the growth of the *hns* null mutant  
7 carrying pGLO-P<sub>cas</sub> was remarkably reduced in LB broth supplemented with or without  
8 ampicillin (B, C).

1 **5. CRISPR-Cas-mediated DNA interference after natural transformation**

2

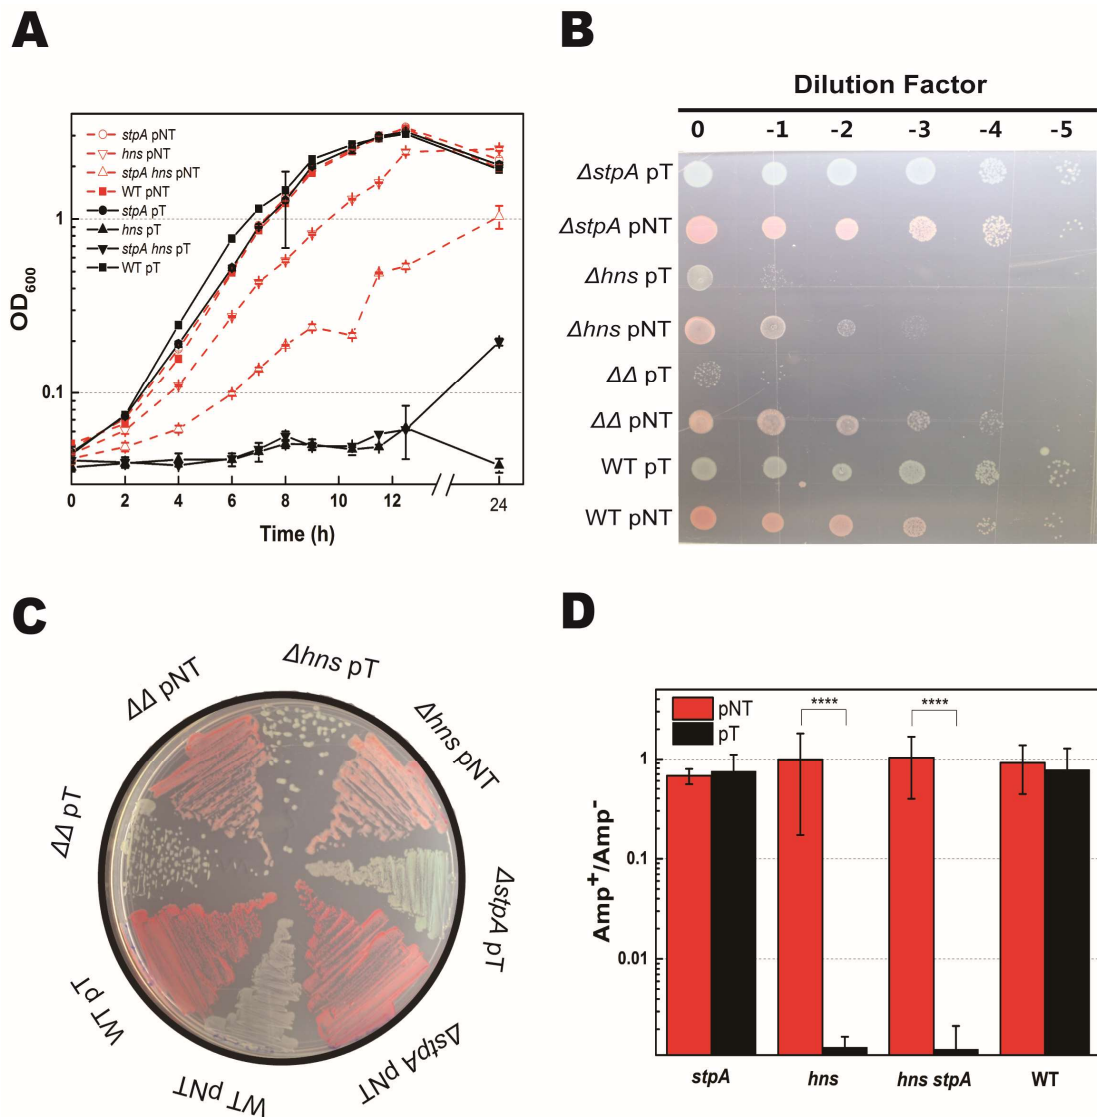

3

4 **FIG S9 Plasmid loss assay in transformants.** (A) Cell growths of transformants

5 carrying the CRISPR-Cas-targeted (pT, black solid lines) and non-targeted (pNT, red

6 dash lines) in LB broth supplemented with ampicillin (100  $\mu\text{g ml}^{-1}$ ).

7 (B) Overnight-grown cell cultures with no antibiotic added were serially diluted followed by drop-

8 plating. (C) Overnight-grown cell cultures with no antibiotic added were streaked on

9 LB-agar plates. (D) The ratio of the number of ampicillin resistant colonies to

- 1 ampicillin sensitive colonies in the overnight-grown cell culture (no antibiotic added)
- 2 was calculated. pT: pCR1; pNT: pDsRED. \*\*\*\*  $P < 0.001$ .
- 3

1 **6. CRISPR-Cas-mediated DNA interference during chemical transformation**

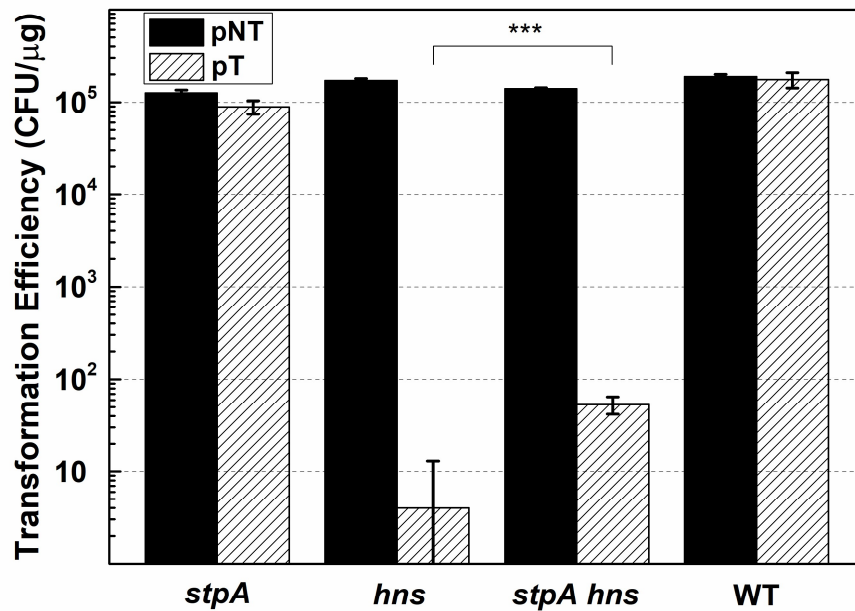

2

3 **FIG S10 Effect of *stpA* inactivation on chemical transformation with CRISPR-**

4 **Cas-targeted plasmid.** Chemically competent cells were prepared by washing

5 exponentially growing cells (OD<sub>600</sub> 0.4 ~ 0.5) twice with the CaCl<sub>2</sub> solution (100 mM).

6 Washed cells were then resuspended in the CaCl<sub>2</sub> solution. The competent cell

7 suspension was mixed with plasmid on ice before a heat shock at 42 °C for 90 seconds.

8 Transformed cells were recovered in LB medium and spread onto selective LB-agar

9 plates. Levels of chemical transformation with the CRISPR-Cas-targeted plasmid pCR1

10 (pT) or non-targeted plasmid pDsRED (pNT) was measured in  $\Delta hns$ ,  $\Delta stpA$ ,  $\Delta hns \Delta stpA$

11 and WT. pT: pCR1; pNT: pDsRED. \*\*\*  $P < 0.005$ .

1 **7. Evaluation of *E. coli* mutants and the reporter system**

2

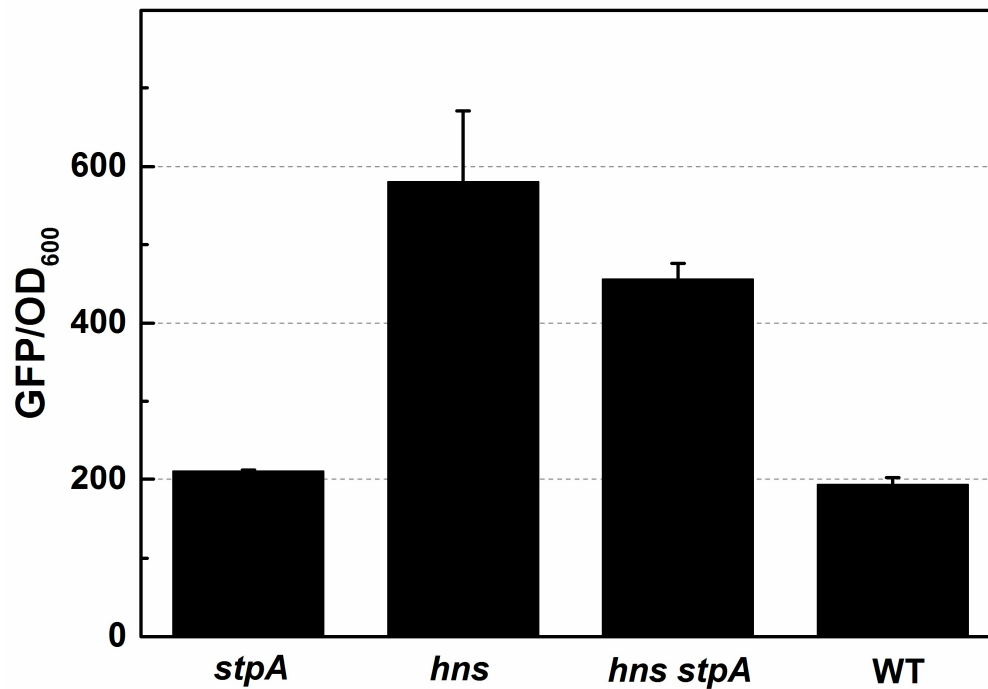

3

4

5 **FIG S11 Quantification of transcription of *rscA* with the reporter plasmid pGLO-**

6  **$P_{rscA}$ -*gfp*.** By fusing the promoter  $P_{rscA}$  with *gfp*, the reporter plasmid pGLO- $P_{rscA}$ -*gfp*

7 was constructed (FIG S4B). We transformed pGLO- $P_{rscA}$ -*gfp* into the *stpA*, *hns*, *hns*

8 *stpA* null mutants and their wildtype parent. Green fluorescence was measured in the

9 cell culture incubated in LB for 24 hours. Data are shown as mean ± SD (n = 3).

10



1 **8. Expression of GFP with a constitutive promoter in *E. coli* strains**

2  
3  
4

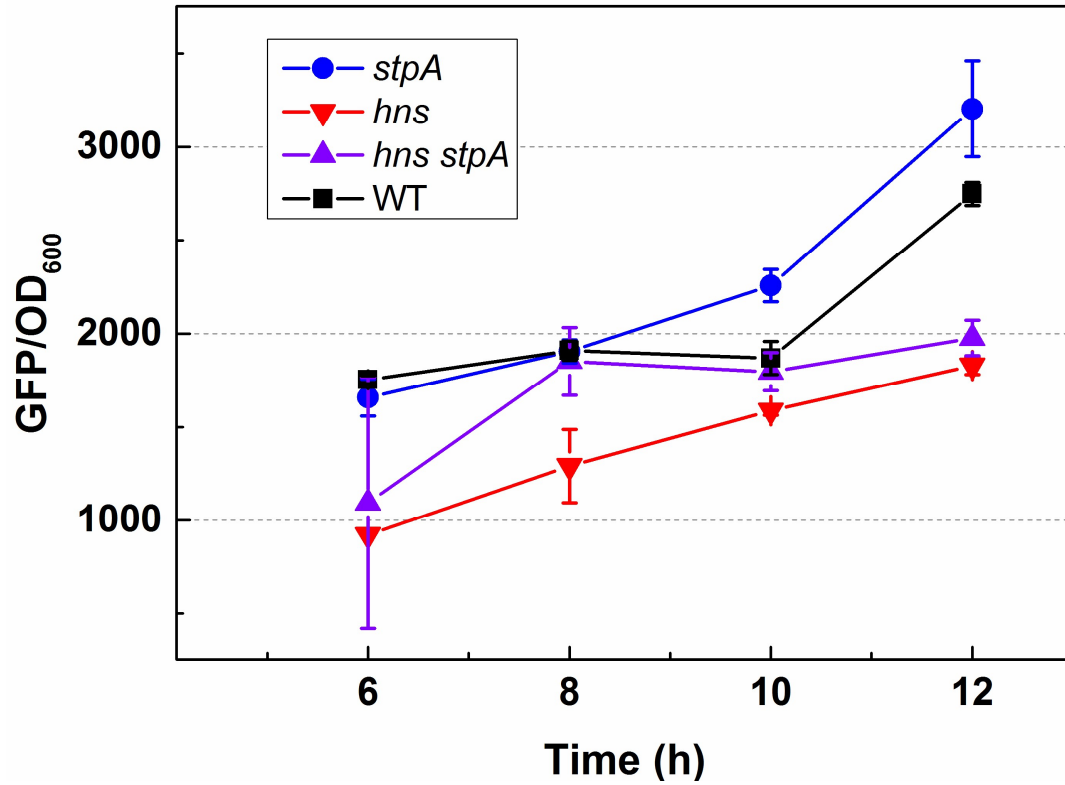

5  
6

7 **FIG S12 Expression of GFP by using P<sub>J23119</sub> in the *hns* and *stpA* null mutants and**  
8 **their wild type parent.** Expression of GFP with the constitutive promoter P<sub>J23119</sub> were  
9 monitored in the *hns*, *stpA* and *hns stpA* null mutants, as well as their wildtype parent  
10 (WT). Obviously, intensities of green fluorescence in the *hns* and *hns stpA* null mutants  
11 were not higher than that in the *stpA* null mutant and WT.

1 **9. Impact of ectopic expression of H-NS and StpA on CRISPR-Cas-mediated**  
2 **immunity against natural transformation during natural transformation**

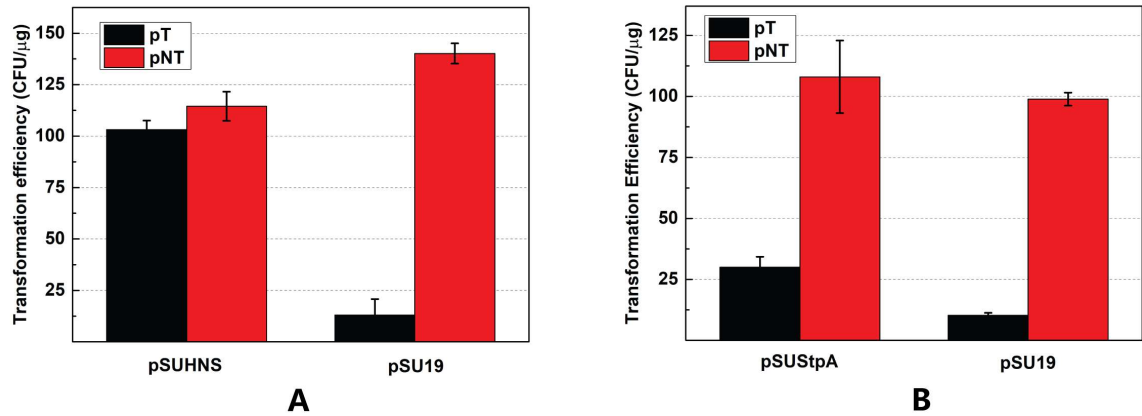

3 **A**

4 **FIG S13 Effect of complementing H-NS and StpA on CRISPR-Cas-mediated DNA**  
5 **interference during natural transformation of the *hns stpA* mutant.** Natural  
6 transformation was performed by spreading the mixture of the 24-hour incubated of *E.*  
7 *coli* culture and plasmid onto LB plates containing 5% (w v<sup>-1</sup>) agar supplemented with  
8 ampicillin (100 μg ml<sup>-1</sup>). Levels of natural transformation with the CRISPR-Cas-  
9 targeted plasmid pCR1 (pT) or non-targeted plasmid pDsRED (pNT) were measured in  
10  $\Delta hns \Delta stpA$  carrying either pSUHNS (A) or pSUStpA (B), with the empty vector as the  
11 control.

12  
13  
14

1 **10. Effect of H-NS expression on the activity of  $P_{cas}$  in the *hns stpA* null mutant.**

2

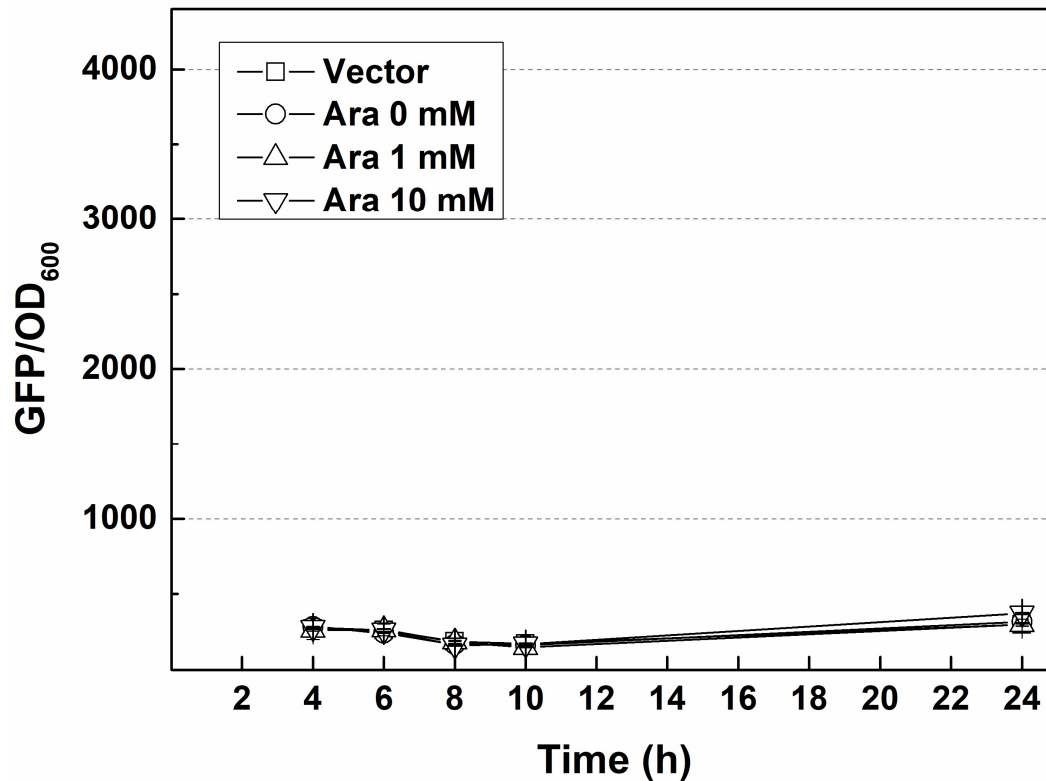

3

4 **FIG S14 Expressing H-NS failed to induce transcription of the *cas* operon.** StpA

5 was found to promote the activity of  $P_{cas}$  when it was expressed at a low level in the

6 *hns stpA* null mutant (FIG 5). To evaluate potential effect of H-NS on the activity of

7  $P_{cas}$  in the *hns stpA* null mutant, pSU-P<sub>BAD</sub>-HNS was constructed to control the

8 expression of H-NS with arabinose (FIG S6) with the empty vector as the control.

9 Transcription of the *cas* operon in the *hns stpA* null mutant harboring pSU-P<sub>BAD</sub>-HNS

10 was low in M9 medium supplemented with arabinose at any tested concentrations (0

11 mM, 1 mM or 10 mM). Therefore, unlike StpA, expressing H-NS at low or high level

12 failed to promote the activity of  $P_{cas}$  in the *hns stpA* null mutant.

13

1 **11. Examination of the DNA binding site of H-NS in the *stpA* null mutant and its**  
2 **wildtype parent.**

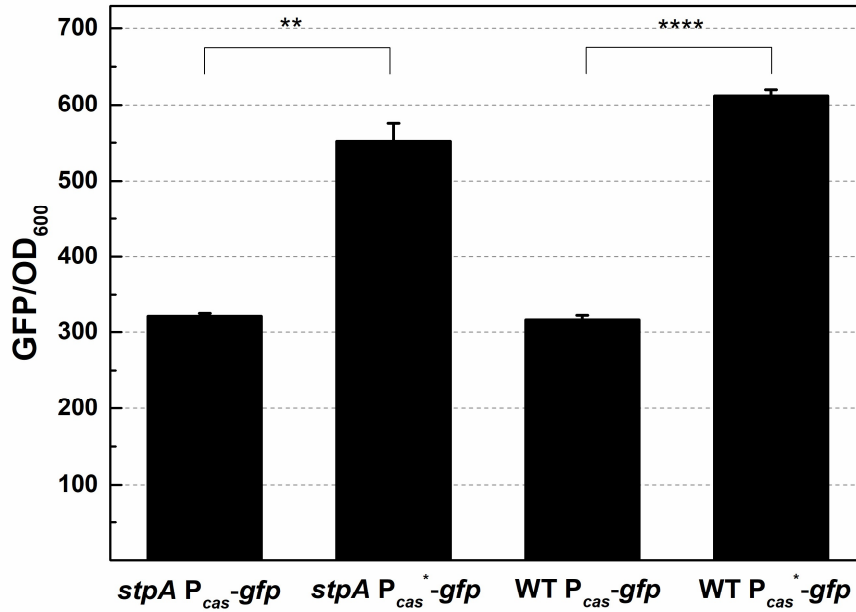

3

4 **FIG S15 DNA binding site for transcriptional regulation by H-NS.** Activities of  
5 *P<sub>cas</sub>-gfp* and *P<sub>cas</sub>\*-gfp* were compared in the *stpA* null mutant and its wildtype parent  
6 that were grown at 30 °C for 24-hour in M9 minimal medium supplemented with 0.32%  
7 (w v<sup>-1</sup>) fructose. Statistical significance was determined using a two tailed Student's  
8 test. \*\*  $P \leq 0.01$ , \*\*\*\*  $P \leq 0.001$ .

9

10

1 **12. Evaluation of qPCR-based assays for crRNA quantification**

2

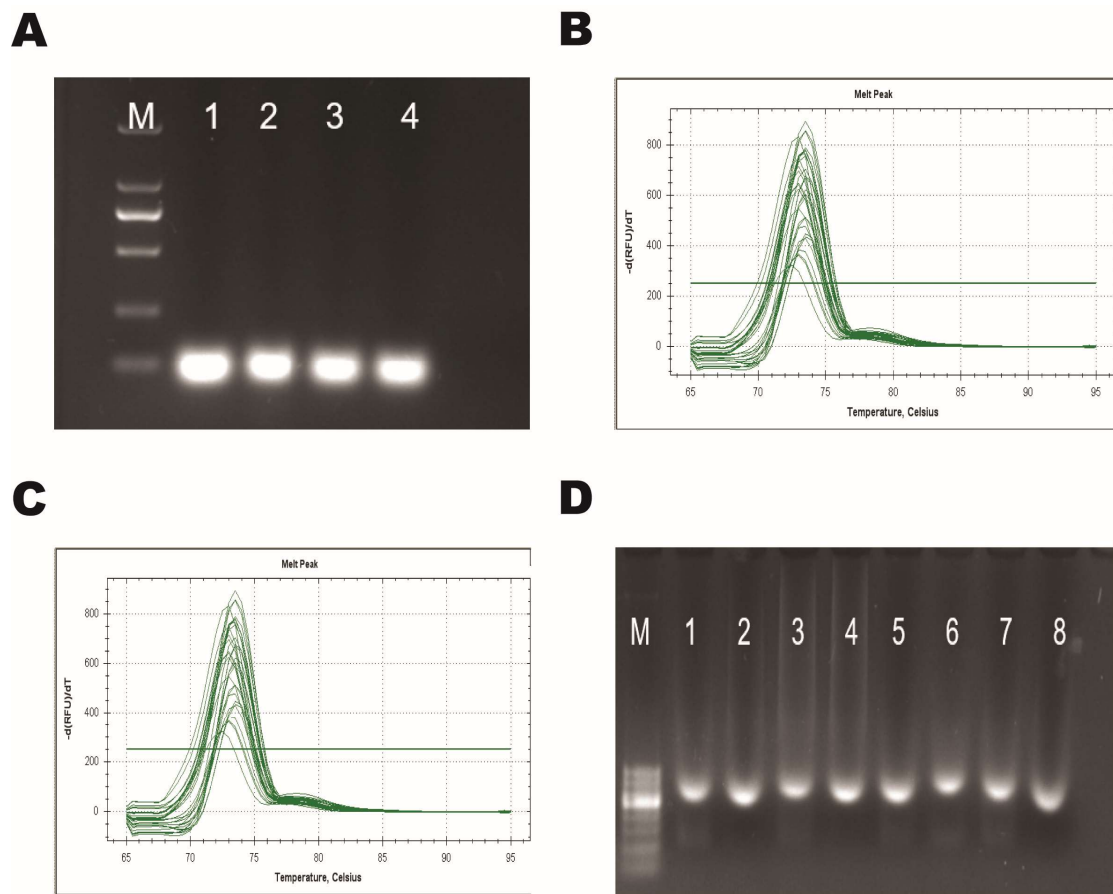

3

4

5 **FIG S16 Examination of purified sRNA and PCR products of transcripts of**

6 **crRNA and tRNA by real-time PCR.** (A) Gel electrophoresis of total RNA. M: 50 bp

7 marker; Lane 1: total sRNA from *ΔstpA*; Lane 2: total sRNA isolated from *Δhns*; Lane

8 3: total sRNA from *ΔstpA Δhns*; Lane 4: total sRNA from WT. (B) Melt curve of reverse

9 transcripts of crRNA. (C) Melt curve of reverse transcripts of tRNA. (D) Gel

10 electrophoresis of RT-PCR products. Lane 1: tRNA of *ΔstpA*; Lane 2: tRNA of *Δhns*;

11 Lane 3: tRNA of *ΔstpA Δhns*; Lane 4: tRNA of WT; Lane 5: crRNA of *ΔstpA*; Lane 6:

12 crRNA of *Δhns*; Lane 7: crRNA of *ΔstpA Δhns*; Lane 8: crRNA of WT; M: 50 bp marker.

13

14

1 **TABLE S2 Natural transformation of *hns stpA* pSU-P<sub>BAD</sub>-*stpA* with CRISPR-**  
 2 **targeted plasmid**  
 3

| Arabinose (mM)                                | 0              | 0.5       | 1      | 2     |
|-----------------------------------------------|----------------|-----------|--------|-------|
| TE <sup>&amp;</sup> (CFU $\mu\text{g}^{-1}$ ) | 35.5 $\pm$ 7.0 | 5 $\pm$ 4 | N. D.* | N. D. |

4

5 <sup>&</sup> TE, Transformation Efficiency.

6 \* N. D., Not Detected, < 1 CFU  $\mu\text{g}^{-1}$

7

1 **TABLE S3 Calculation of the cellular concentration of StpA**

| Item                           | Method/Reference                                                                                                        | Result                                       |
|--------------------------------|-------------------------------------------------------------------------------------------------------------------------|----------------------------------------------|
| Concentration of StpA-His      | Protein assay kit                                                                                                       | 0.25 mg ml <sup>-1</sup>                     |
| Concentration of StpA for WB   | FIG 5F in the main text                                                                                                 | ~ 0.025 mg ml <sup>-1</sup>                  |
| Amount of StpA in 1 ml culture | Proteins from 50 ml culture<br>resuspended in 5 ml PBS                                                                  | ~ 0.0025 mg ml <sup>-1</sup>                 |
| Viable cell density            | Plate counting                                                                                                          | ~ 5.4 × 10 <sup>9</sup> CFU ml <sup>-1</sup> |
| Amount of StpA in each cell    | Calculation: 0.0025 mg ml <sup>-1</sup> ÷<br>5.4 × 10 <sup>9</sup> CFU ml <sup>-1</sup>                                 | 4.6 × 10 <sup>-16</sup> g                    |
| Number of StpA in each cell    | Calculation: (4.6 × 10 <sup>-16</sup> g) ÷<br>(15.3 × 10 <sup>3</sup> Da) × (6.022 × 10 <sup>23</sup><br>molecules/mol) | 1.8 × 10 <sup>4</sup> molecules              |
| StpA : DNA                     | Calculation: 1.81 × 10 <sup>4</sup><br>molecules : 4.2 × 10 <sup>6</sup> bp                                             | ~ 1 : 200                                    |

2

3

## 1 SUPPLEMENTAL REFERENCES

- 2 1. Datsenko KA, Wanner BL. 2000. One-step inactivation of chromosomal genes  
3 in *Escherichia coli* K-12 using PCR products. P Natl Acad Sci 97:6640-5.
- 4 2. Chen CY, Nace GW, Irwin PL. 2003. A 6 x 6 drop plate method for simultaneous  
5 colony counting and MPN enumeration of *Campylobacter jejuni*, *Listeria*  
6 *monocytogenes*, and *Escherichia coli*. J Microbiol Meth, 55:475-479.
- 7 3. Jett BD, Hatter KL, Huycke MM, Gilmore MS. 1997. Simplified agar plate  
8 method for quantifying viable bacteria. Biotechniques, 23:648-650.
- 9 4. Joseph Sambrook DWR. 2002. Molecular cloning: a laboratory manual, 3rd ed.  
10 Cold Spring Harbor Laboratory Press.
- 11 5. Sun D, Zhang X, Wang L, Prudhomme M, Xie Z, Martin B, Claverys JP. 2009.  
12 Transforming DNA uptake gene orthologs do not mediate spontaneous plasmid  
13 transformation in *Escherichia coli*. J Bacteriol 191:713-9.
- 14 6. Zhang Y, Shi C, Yu J, Ren J, Sun D. 2012. RpoS regulates a novel type of  
15 plasmid DNA transfer in *Escherichia coli*. PLoS ONE 7:e33514.
- 16 7. Kaidow A, Wachi M, Nakamura J, Magae J, Nagai K. 1995. Anucleate cell  
17 production by *Escherichia coli* delta *hns* mutant lacking a histone-like protein,  
18 H-NS. J Bacteriol 177:3589-92.
- 19 8. Zhang A, Rimsky S, Reaban ME, Buc H, Belfort M. 1996. *Escherichia coli*  
20 protein analogs StpA and H-NS: regulatory loops, similar and disparate effects  
21 on nucleic acid dynamics. EMBO J 15:1340-9.
- 22 9. Sonden B, Uhlin BE. 1996. Coordinated and differential expression of histone-  
23 like proteins in *Escherichia coli*: regulation and function of the H-NS analog  
24 StpA. EMBO J 15:4970-80.

25

26



1 **DNA SEQUENCE INFORMATION**

2 **1. Sequence of the type I-E CRISPR-Cas system** (GenBank accession number:

3 NC\_000913)

4

5 **From 5' to 3':**

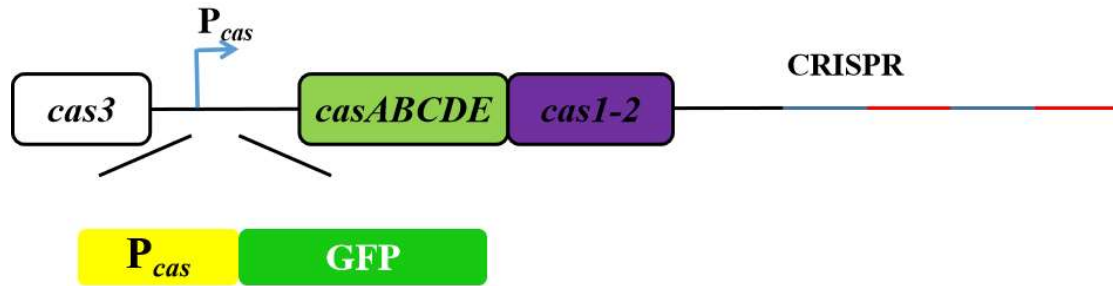

6

7 **FIG S17 Sketch map of type I-E CRISPR-Cas system**

8

9 **The Gene encoding the nuclease**

10 ***cas3* (*ygcB*)**

11 ATGGAACCTTTTAAATATATATGCCATTACTGGGGAAAATCCTCAAAAAGCT  
12 TGACGAAAGGAAATGATATTCATCTGTTAATTTATCATTGCCTTGATGTTGCT  
13 GCTGTTGCAGATTGCTGGTGGGATCAATCAGTCGTACTGCAAAATACTTTTT  
14 GCCGAAATGAAATGCTATCAAACAGAGGGTGAAGGCCTGGCTGTTATTTT  
15 TCATTGCTCTTCATGATATTGGAAAGTTTGATATACGATTCCAATATAAATCA  
16 GCAGAAAGTTGGCTGAAATTAATCCTGCAACGCCATCACTTAATGGTCCA  
17 TCAACACAAATGTGCCGTAATTTAATCATGGTGCAGCCGGTCTGTATTGGT  
18 TTAACCAGGATTCACTTTCAGAGCAATCTCTCGGGGATTTTTTCAGTTTTTT  
19 TGATGCCGCTCCTCATCCTTATGAGTCCTGGTTTCCATGGGTAGAGGCCGTT  
20 ACAGGACATCATGGTTTTATATTACATCCCAGGATCAAGATAAGTCGCGTT  
21 GGGAAATGCCAGCTTCTCTGGCATCTTATGCTGCGCAAGATAAACAGGCTC  
22 GTGAGGAGTGGATATCTGTAAGCATTATTTTTAACGCCAGCGGGGT  
23 TATCTATAAACGATATAACCCTGATTGTTTCATCACTGTTAGCAGGTTTTTGC  
24 TCGCTTGCTGACTGGTTAGGCTCCTGGACTACAACGAATACCTTTCTGTTA  
25 ATGAGGATGCGCCTTCCGACATAAATGCTCTGAGAACGTATTTCCAGGACC  
26 GACAGCAGGATGCGAGCCGGGTATTGGAGTTGAGTGGACTTGTATCAAATA  
27 AGCGATGTTATGAAGGTGTTTCATGCACTACTGGACAATGGCTATCAACCCA  
28 GACAATTACAGGTGTTAGTTGATGCTCTTCCAGTAGCTCCCGGGCTGACGG  
29 TAATAGAGGCACCTACAGGCTCCGGTAAAACGGAAACAGCGCTGGCCTATG  
30 CTTGGAAACTTATTGATCAACAAATTGCGGATAGTGTTATTTTTGCCCTCCC  
31 AACACAAGCTACCGCGAATGCTATGCTTACGAGAATGGAAGCGAGCGCGA  
32 GCCACTATTTTTCATCCCCAAATCTTATTCTTGCTCATGGCAATTCACGGTTT  
33 AACCACCTCTTTCAATCAATAAAATCACGCGCGATTACTGAACAGGGGCAA  
34 GAAGAAGCGTGGGTTTCAGTGTTGTCAGTGGTTGTCACAAAGCAATAAGAA

1 AGTGTTCCTTGGGCAAATCGGCGTTTGCACGATTGATCAGGTGTTGATATCG  
2 GTATTGCCAGTTAAACACCGCTTTATCCGTGGTTTGGGAATTGGTCGAAGTG  
3 TTTAATTGTTGATGAAGTTCATGCTTACGACACCTATATGAACGGCTTGCT  
4 GGAGGCAGTGCTCAAGGCTCAGGCTGATGTGGGAGGGAGTGTTATTCTTCT  
5 TTCCGCAACCCTACCAATGAAACAAAAACAGAACTTCTGGATACTTATGG  
6 TCTGCATACAGATCCAGTGGAAAATAACTCCGCATATCCACTCATTAACTGG  
7 CGAGGTGTGAATGGTGCGCAACGTTTTGATCTGCTAGCTCATCCAGAACAA  
8 CTCCCGCCCCGCTTTTCGATTCAGCCAGAACCTATTTGTTAGCTGACATGT  
9 TACCTGACCTTACGATGTTAGAGCGAATGATCGCAGCGGCAAACGCGGGTG  
10 CACAGGTCTGTCTTATTTGCAATTTGGTTGACGTTGCACAAGTATGCTACCA  
11 ACGGCTAAAGGAGCTAAATAACACGCAAGTAGATATAGATTTGTTTCATGC  
12 GCGCTTTACGCTGAACGATCGTCGTGAAAAAGAGAATCGAGTTATTAGCAA  
13 TTTCGGCAAAAATGGGAAGCGAAATGTTGGACGGATACTTGTCGCAACCC  
14 AGGTCGTGGAACAATCACTCGACGTTGATTTTGATTGGTTAATTACTCAGCA  
15 TTGTCCTGCAGATTTGCTTTTCCAACGATTGGGCCGTTTACATCGCCATCAT  
16 CGCAAATATCGTCCCCTGGTTTTGAGATTCCCTGTTGCCACCATTTTGCTGC  
17 CTGATGGCGAGGGTTACGGACGACATGAGCATATTTATAGCAACGTTAGAG  
18 TCATGTGGCGGACGCAGCAACATATTGAGGAGCTTAATGGAGCATCCTTATT  
19 TTTCCCTGATGCTTACCGGCAATGGCTGGATAGCATTACGATGATGCGGAA  
20 ATGGATGAGCCAGAATGGGTCGGCAATGGCATGGATAAATTTGAAAGCGCC  
21 GAGTGTGAAAAAAGGTTCAAGGCTCGCAAGGTCCTGCAGTGGGCTGAAG  
22 AATATAGCTTGCAGGATAACGATGAAACCATTCTTGCGGTAACGAGGGATG  
23 GGGAAATGAGCCTGCCATTATTGCCCTTATGTACAAACGTCTTCAGGTAAAC  
24 AACTGCTCGATGGCCAGGTCTACGAGGACCTAAGTCATGAACAGCAGTATG  
25 AGGCGCTTGC ACTTAATCGCGTCAATGTACCCTTCACCTGGAAACGTAGTT  
26 TTTCTGAAGTAGTAGATGAAGATGGGTTACTTTGGCTGGAAGGGAAACAGA  
27 ATCTGGATGGATGGGTCTGGCAGGGTAACAGTATTGTTATTACCTATACAGG  
28 GGATGAAGGGATGACCAGAGTCATCCCTGCAAATCCCAAATAA

29

### 30 **Genes encoding components of Cascade**

#### 31 *casA (ygcL)*

32 ATGAATTTGCTTATTGATAACTGGATCCCTGTACGCCCGCGAAACGGGGGG  
33 AAAGTCCAAATCATAAATCTGCAATCGCTATACTGCAGTAGAGATCAGTGG  
34 CGATTAAGTTTGCCCCGTGACGATATGGAACCTGGCCGCTTTAGCACTGCTG  
35 GTTTGCATTGGGCAAATTATCGCCCCGGCAAAGATGACGTTGAATTTCGA  
36 CATCGCATAATGAATCCGCTCACTGAAGATGAGTTTCAACAACTCATCGCG  
37 CCGTGGATAGATATGTTCTACCTTAATCACGCAGAACATCCCTTTATGCAGA  
38 CCAAAGGTGTCAAAGCAAATGATGTGACTCCAATGGAAAACTGTTGGCT  
39 GGGGTAAGCGGCGCGACGAATTGTGCATTTGTCAATCAACCGGGGCAGGG  
40 TGAAGCATTATGTGGTGGATGCACTGCGATTGCGTTATTCAACCAGGCGAAT  
41 CAGGCACCAGGTTTTGGTGGTGGTTTTAAAGCGGTTTACGTGGAGGAAC  
42 ACCTGTAACAACGTTTCGTACGTGGGATCGATCTTCGTTCAACGGTGTTACTC

1 AATGTCCTCACATTACCTCGTCTTCAAAAACAATTTCTAATGAATCACATA  
2 CGGAAAACCAACCTACCTGGATTAAACCTATCAAGTCCAATGAGTCTATAC  
3 CTGCTTCGTCAATTGGGTTTGTCCGTGGTCTATTCTGGCAACCAGCGCATAT  
4 TGAATTATGCGATCCATTGGGATTGGTAAATGTTCTTGCTGTGGACAGGAA  
5 AGCAATTTGCGTTATACCGGTTTTCTTAAGGAAAAATTTACCTTTACAGTTA  
6 ATGGGCTATGGCCCCATCCGCATTCCCCTTGTCTGGTAACAGTCAAGAAAG  
7 GGGAGGTTGAGGAAAAATTTCTTGCTTTCACCACCTCCGCACCATCATGGA  
8 CACAAATCAGCCGAGTTGTGGTAGATAAGATTATTCAAATGAAAATGGAA  
9 ATCGCGTGGCGGCGGTTGTGAATCAATTCAGAAATATTGCGCCGCAAAGTC  
10 CTCTTGAATTGATTATGGGGGGATATCGTAATAATCAAGCATCTATTCTTGAA  
11 CGGCGTCATGATGTGTTGATGTTTAATCAGGGGTGGCAACAATACGGCAAT  
12 GTGATAAACGAAATAGTGACTGTTGGTTTGGGATATAAACAGCCTTACGC  
13 AAGGCGTTATATACCTTTGCAGAAGGGTTTAAAAATAAAGACTTCAAAGGG  
14 GCCGGAGTCTCTGTTTCATGAGACTGCAGAAAGGCATTTCTATCGACAGAGT  
15 GAATTATTAATTCCCGATGTAAGTGGCGAATGTTAATTTTTCCAGGCTGATGA  
16 GGTAATAGCTGATTTACGAGACAACTTCATCAATTGTGTGAAATGCTATTT  
17 AATCAATCTGTAGCTCCCTATGCACATCATCCTAAATTAATAAGCACATTAGC  
18 GCTTGCCCGCGCCACGCTATACAAACATTTACGGGAGTTAAAACCGCAAGG  
19 AGGGCCATCAAATGGCTGA

20

21 *casB (ygcK)*

22 ATGGCTGATGAAATTGATGCAATGGCTTTATATCGAGCCTGGCAACAACCTGG  
23 ATAATGGATCATGTGCGCAAATTAGACGTGTTTCAGAACCTGATGAATTACG  
24 CGATATCCCTGCGTTTTATAGGCTGGTGCAACCTTTTGGTTGGGAAAACCCA  
25 CGTACCAGCAGGCTCTTTTGCGCATGGTGTGTTTGCCTGAGCGCAGGAAAG  
26 AATGTCATCCGACATCAGGACAAAAAATCGGAGCAAACAACAGGTATCTC  
27 GTTGGGAAGAGCTTTAGCCAATAGTGGAAGAATTAACGAGCGCCGTATCTT  
28 TCAATTAATTCGGGCTGACAGAACAGCCGATATGGTCCAGTTACGTCGATTA  
29 CTTACTCACGCCGAACCCGTACTTGACTGGCCATTAATGGCCAGGATGTTG  
30 ACCTGGTGGGGAAAGCGCGAACGCCAGCAACTTCTGGAAGATTTGTATT  
31 GACCACAAACAAAAATGCGTAA

32

33 *casC (ygcJ)*

34 ATGTCTAACTTTATCAATATTCATGTTCTGATCTCTCACAGCCCTTCATGTCT  
35 GAACCGCGACGATATGAACATGCAGAAAGACGCTATTTTCGGCGGCAAAA  
36 GACGAGTAAGAATTTCAAGTCAAAGCCTTAAACGTGCGATGCGTAAAAGT  
37 GGTTATTACGCACAAAATATTGGTGAATCCAGTCTCAGAACCATTTCATCTTG  
38 CACAATTACGTGATGTTCTTCGGCAAAAACCTTGGTGAACGTTTTGACCAAA  
39 AAATCATCGATAAGACATTAGCGCTGCTCTCCGGTAAATCAGTTGATGAAGC  
40 CGAAAAGATTTCTGCCGATGCGGTTACTCCCTGGGTTGTGGGAGAAATAGC  
41 CTGGTTCTGTGAGCAGGTTGCAAAAGCAGAGGCTGATAATCTGGATGATAA  
42 AAAGCTGCTCAAAGTTCTTAAGGAAGATATTGCCGCCATACGTGTGAATTT  
43 ACAGCAGGGTGTGATATTGCGCTTAGTGGAAGAATGGCAACCAGCGGCAT  
44 GATGACTGAGTTGGGAAAAGTTGATGGTGAATGTCCATTGCGCATGCGAT

1 CACTACTCATCAGGTTGATTCTGATATTGACTGGTTCACCGCTGTAGATGAT  
2 TTACAGGAACAAGGTTCTGCACATCTGGGAACTCAGGAATTTTCATCGGGT  
3 GTTTTTTATCGTTATGCCAACATTAACCTCGCTCAACTTCAGGAAAATTTAG  
4 GTGGTGCCTCCAGGGAGCAGGCTCTGGAAATTGCAACCCATGTTGTTTATA  
5 TGCTGGCAACAGAGGTCCCTGGAGCAAAACAGCGTACTTATGCCGCTTTTA  
6 ACCCTGCGGATATGGTAATGGTTAATTTCTCCGATATGCCACTTTCTATGGCA  
7 AATGCTTTTGAAAAAGCGGTTAAAGCGAAAGATGGCTTTTTTGCAACCGTCT  
8 ATACAGGCGTTAATCAATATTGGGATCGCGTTGCCAATGGATATGGTCTGA  
9 ACGGAGCTGCTGCGCAATTCAGCTTATCTGATGTAGACCCAATTACTGCTCA  
10 AGTTAAACAAATGCCTACTTTAGAACAGTTAAAATCCTGGGTTTCGTAATAAT  
11 GGCGAGGCGTGA

12

13 *casD (ygcI)*

14 GTGAACATGAGATCTTATTTGATCTTGCGGCTTGCTGGGCCAATGCAAGCCT  
15 GGGGGCAGCCGACCTTTGAAGGAACGCGACCTACCGGAAGATTTCCGACC  
16 CGAAGCGGGTTATTAGGGCTACTCGGGGCTTGTCTTGGGATCCAACGTGAT  
17 GATACTTCTTCATTACAGGCGTTATCAGAGAGTGTGCAATTTGCAGTGCCT  
18 GCGATGAACTCATTCTTGACGATCGTCGTGTGTCTGTAACGGGGTTGCGTG  
19 ATTACCATACAGTCCTTGGAGCGCGAGAAGATTACCGTGGTTTGAAAAGTC  
20 ATGAAACGATTCAAACATGGCGCGAATATTTATGTGATGCCTCCTTTACCGT  
21 CGCTCTCTGGTTAACACCCCATGCAACGATGGTTATCTCAGAACTTGAAAA  
22 AGCAGTATTAAGCCTCGGTATACACCTTACCTGGGGCGGAGAAGTTGCCC  
23 ACTAACACACCCGCTTTTTTTGGGGACATGTCAGGCATCGGATCCTCAGAA  
24 GGCGCTATTAATTATGAGCCCGTTGGCGGCGATATATATAGTGAGGAATCA  
25 GTTACAGGGCATCATTTAAAATTTACGGCGCGCGACGAACCGATGATCACC  
26 TTGCCTCGACAATTTGCTTCCCGAGAATGGTATGTGATTAAGGAGGTATGG  
27 ATGTATCTCAGTAA

28

29 *casE (ygcH)*

30 ATGTATCTCAGTAAAGTCATCATTGCCAGGGCCTGGAGCAGGGATCTTTACC  
31 AACTTCACCAGGGATTATGGCATTATTTCCAAACAGACCGGATGCTGCTCG  
32 TGATTTTCTTTTTTCATGTTGAGAAGCGAAACACACCAGAAGGCTGTCATGT  
33 TTTATTGCAGTCAGCGCAAATGCCTGTTTCAACTGCCGTTGCGACAGTCATT  
34 AAAACTAAACAGGTTGAATTTCAACTTCAGGTTGGTGTTCCTACTTATTTTC  
35 GGCTTCGGGCAAATCCGATCAAACTATTCTCGACAATCAAAGCGCCTGG  
36 ACAGTAAAGGGAATATTAACGCTGTCGGGTTCCGTTAATAAAAAGAAGCAG  
37 AACAAATCGCGTGGTTGCAACGTAAATTGGGCAATGCGGCGCGCGTTGAA  
38 GATGTGCATCCCATATCGGAACGGCCACAGTATTTTTCTGGTGATGGTAAAA  
39 GTGGAAAGATCCAAACGGTTTGCTTTGAAGGTGTGCTCACCATCAACGAC  
40 GCGCCAGCGTTAATAGATCTTGTACAGCAAGGTATTGGGCCAGCTAAATCG  
41 ATGGGATGTGGCTTGCTATCTTTGGCTCCACTGTGA

42

43 **Genes encoding Cas1 and Cas2 which are involved in adaption**

1 *cas1 (ygbT)*  
2 ATGACCTGGCTTCCCCTTAATCCCATTCCACTCAAAGATCGCGTCTCCATGA  
3 TCTTTCTGCAATATGGGCAGATCGATGTAATAGATGGCGCGTTTGTACTTATC  
4 GACAAGACAGGGATCCGCACTCATATTCCTGTTGGCTCGGTTGCCTGCATC  
5 ATGCTGGAACCTGGTACACGGGTTTCGCATGCAGCTGTACGCCTGGCTGCG  
6 CAAGTTGGAACATTGTTGGTATGGGTGGGGGAAGCGGGCGTTCGTGTTTAT  
7 GCTTCTGGTCAGCCTGGAGGTGCGCGTTCAGATAAGCTGCTCTATCAGGCA  
8 AAAGTTGCTCTGGATGAAGATTTGCGTCTGAAGGTCGTACGTAAAATGTTT  
9 GAACTTCGGTTTGGAGAACCTGCGCCTGCCCGGCGCTCCGTAGAGCAACT  
10 CAGAGGTATAGAAGGCAGTCGCGTGCGGGCAACCTACGCACTTCTGGCGA  
11 AGCAATACGGCGTGACATGGAATGGACGTCGCTACGATCCGAAAGACTGG  
12 GAAAAGGGCGATACGATCAACCAATGCATTAGCGCTGCAACTTCTGTTTA  
13 TACGGCGTAACTGAAGCGGGGATACTTGCAGCTGGTTATGCACCAGCTATT  
14 GGGTTTGTGCATACAGGAAAGCCTCTTTCCTTTGTTTACGATATTGCAGACA  
15 TCATTAATTTGACACTGTTGTACCGAAAGCTTTTGAGATAGCGCGTCGTAA  
16 CCCTGGTGAGCCGGACCGGGAAGTCCGTTTGGCGTGCAGGGATATTTTTCG  
17 CAGTAGTAAAACATTAGCCAAATTGATTCCGCTTATAGAGGACGTGCTTGCC  
18 GCTGGAGAAATACAACCGCCGGCCCCACCTGAAGATGCACAGCCTGTTGC  
19 CATTCCGCTTCTGTTTCACTGGGAGATGCAGGCCATCGGAGTAGCTGA

20  
21 *cas2 (ygbF)*  
22 ATGAGTATGTTGGTCGTGGTCACTGAAAATGTACCTCCGCGCTTACGAGGC  
23 AGATTAGCCATCTGGTTGTTGGAGGTACGTGCAGGGGTATATGTAGGTGATG  
24 TATCCGCAAAAATTCGTGAAATGATCTGGGAACAAATAGCTGGACTGGCGG  
25 AAGAAGGCAATGTAGTGATGGCATGGGCAACGAATACGGAAACGGGATTT  
26 GAGTTCCAGACATTTGGGTTAAACAGGCGTACCCCGGTAGATTTGGATGGT  
27 TTAAGGTTGGTGTCTTTTTTACCTGTTTGA

28  
29 **CRISPR array I** (Repeats are indicated with black letters on yellow background.

30 Spacers are indicated with black letters on green background)

31  
32 **From 5' to 3':**

33 TGGGAACAAATAGCTGGACTGGCAGGAAAGAAGGCAATGTAGTGATGGCATG  
34 GGCAACGAATACGGAAACGGGATTTGAGTTCCAGACATTTGGGTTAAACA  
35 GCGTACCCCGGTAGATTTGGATGGTTTAAAGGTTGGTGTCTTTTTTACCTGT  
36 TTGAAAACAAAGAATTAGCTGATCTTTAATAATAAGGAAATGTTACATTAAG  
37 GTTGGTGGGTTGTTTTTATGGGAAAAAATGCTTTAAGAACAAATGTATACTT  
38 TTAGA**GAGTTCCCCGCGCCAGCGGGGATAAACCGCTTTCGCAGACGCGCG**  
39 **GCGATACGCTCACGCA**GAGTTCCCCGCGCCAGCGGGGATAAACCG**CAGCC**  
40 **GAAGCCAAAGGTGATGCCGAACACGCT**GAGTTCCCCGCGCCAGCGGGGAT  
41 **AAACCGGGCTCCCTGTCGGTTGTAATTGATAATGTTGAGAGTTCCCCGCGC**  
42 **CAGCGGGGATAAACCGTTTGGATCGGGTCTGGAATTTCTGAGCGGTCGCGA**  
43 **GTTCCCCGCGCCAGCGGGGATAAACCGCGAATCGCGCATAACCTGCGCGTC**

1 GCCGCCTGC GAGTTC CCGCGCCAGCGGGGATAAACCG TCAGCTTTATAAA  
2 TCCGGAGATACGGAAACTAGAGTTC CCGCGCCAGCGGGGATAAACCGGA  
3 CTCACCCCGAAAGAGATTGCCAGCCAGCTT GAGTTC CCGCGCCAGCGGG  
4 GATAAACCG CTGCTGGAGCTGGCTGCAAGGCAAGCCGCCA GAGTTC CCG  
5 GCGCCAGCGGGGATAAACCG GGGGGCGCATGACCGTAAACATTATCCCCCG  
6 GGAGTTC CCGCGCCAGCGGGGATAAACCG GGAGTTCAGACATAGGTGGA  
7 ATGATGGACTACGAGTTC CCGCGT TAGCGGGGATAAACCGCCCGGTAGCC  
8 AGGTTTGCAACGCCTGAACCGAGAGTTC CCGCGCCAGCAGGGATAAACCC  
9 GGCAACGACGGTGAGATTTACGCCTGACGCTGGTGTTCCCGCATCAGC  
10 GGGGATAAACCGGGCGCACTGGATGCGATGATGGATATCACTTGGAGTTCC  
11 CCCGCCTCTGCGGTAGAACTCCCAGCTCCCATTTTCAAACCCATCAAGACG  
12 CCTTCGCCAACTCCTTCACCAGAGGTAGCATTATCCGCATA  
13



1 **3. Sequence of the promoter of the *cas* operon** (GenBank accession number:  
2 NC\_000913; TSS: Transcription Start Site)

3  
4 **From 5' to 3':**

5 TTAT CAATG ACGAT AATAA GACCA ATAAC GGTTT ATCCC TACTT AAGTA

6 <sup>-350</sup>  
GGGAA GGTGC ACAAT GTACA TCTTC TTTA ATTTC CCGGT ATGAG

7 <sup>-300</sup>  
ATTTT ATATT CACAG TATGA ATATTT TATGTA ATAAA ATTCAT GGTA

8 <sup>-250</sup> **H-NS Binding Site**  
TTATT ATAAC TAAAA GTTTC TTTAA TAATA AAACG AATAA CTTGC

9 <sup>-200</sup> **TSS**  
AGATT TGAAA TGCAT GCATT ATTGT CTTTA ACAA TTCAA CACAT

10 <sup>-150</sup>  
CTTAA TATAT GTATA GGTTA ATTGT ATTAA ACCAA TGAAT ATATT TTTGC

11 <sup>-100</sup>  
AGTGA ATGTG ATTAT TGAAT TAATT ACGCC GTATT TTTTC TTTGT TTTA

12 <sup>-50</sup>  
CCGAT AACGG AAGTG TGCCG ACGTA TAGAA ATGCA GGAGA AATGT

13 <sup>-1</sup>  
CGGAG CATAT GAAGG AGAACAA

14

15

16



1 **4. Complete Sequence of pCR1** (AddGene accession number: 154270; repeats  
2 and PAMs are on red and green backgrounds respectively)

3

4 **From 5' to 3':**

5 TCGCGCGTTTCGGTGATGACGGTGAAAACCTCTGACACATGCAGCTCCCGG  
6 AGACGGTCACAGCTTGTCTGTAAGCGGATGCCGGGAGCAGACAAGCCCGT  
7 CAGGGCGCGTCAGCGGGTGTGGCGGGTGTTCGGGGCTGGCTTAACTATGC  
8 GGCATCAGAGCAGATTGTAAGTGCACCATATGCGGTGTGAAATACC  
9 GCACAGATGCGTAAGGAGAAAATACCGCATCAGGCGCCATTCGCCATTCAG  
10 GCTGCGCAACTGTTGGGAAGGGCGATCGGTGCGGGCCTCTTCGCTATTACG  
11 CCAGCTGGCGAAAGGGGGATGTGCTGCAAGGCGATTAAGTTGGGTAACGC  
12 CAGGGTTTTCCAGTCACGACGTTGTAACGACGGCCAGTGGAATTCGA  
13 GTTCCCCGCGCCAGCGGGGATAAAAGCTTTCGCAGACGCGCGGGCGATAC  
14 GCTCACGCAAGTTCCCCGCGCCAGCGGGGATAAAAGCAGCCGAAGCCA  
15 AAGGTGATGCCGAACACGCTGAGTTCCCCGCGCCAGCGGGGATAAAAGG  
16 GCTCCCTGTCGGTTGTAATTGATAATGTTGAGAGTTCCCCGCGCCAGCGGG  
17 GATAAAAGTTTGGATCGGGTCTGGAATTTCTGAGCGGTCGCAGTTCCCC  
18 CGCCAGCGGGGATAAAAGAAAGCTTAGCTTGGCGTAATCATGGTCATAGC  
19 TGTTTCCTGTGTGAAATTGTTATCCGCTCACAATTCACACAACATACGAGC  
20 CGGAAGCATAAAGTGTAAGCCTGGGGTGCCTAATGAGTGAGCTAACTCA  
21 CATTAAATTGCGTTGCGCTCACTGCCGCTTCCAGTCGGGAAACCTGTCGT  
22 GCCAGCTGCATTAATGAATCGGCCAACGCGCGGGGAGAGGCGGTTTTCGT  
23 ATTGGGCGCTCTTCCGCTTCCTCGCTCACTGACTCGCTGCGCTCGGTCGTTT  
24 GGCTGCGGCGAGCGGTATCAGCTCACTCAAAGGCGGTAATACGGTTATCCA  
25 CAGAATCAGGGGATAACGCAGGAAAGAACATGTGAGCAAAAGGCCAGCA  
26 AAAGGCCAGGAACCGTAAAAAGGCCGCGTTGCTGGCGTTTTTCCATAGGC  
27 TCCGCCCCCTGACGAGCATCACAAAATCGACGCTCAAGTCAGAGGTGG  
28 CGAAACCCGACAGGACTATAAAGATACCAGGCGTTTCCCCCTGGAAGCTCC  
29 CTCGTGCGCTCTCCTGTTCCGACCCTGCCGTTACCGGATACCTGTCCGCCT  
30 TTCTCCCTTCGGGAAGCGTGGCGCTTCTCATAGCTCACGCTGTAGGTATCT  
31 CAGTTCGGTGTAGGTCGTTTCGCTCCAAGCTGGGCTGTGTGCACGAACCCCC  
32 CGTTCAGCCCGACCGCTGCGCCTTATCCGGTAACTATCGTCTTGAGTCCAAC  
33 CCGGTAAGACACGACTTATCGCCACTGGCAGCAGCCACTGGTAACAGGATT  
34 AGCAGAGCGAGGTATGTAGGCGGTGCTACAGAGTTCTTGAAGTGGTGGCC  
35 TAACTACGGCTACACTAGAAGAACAGTATTTGGTATCTGCGCTCTGCTGAA  
36 GCCAGTTACCTTCGGAAAAAGAGTTGGTAGCTCTTGATCCGGCAAACAAA

1 CCACCGCTGGTAGCGGTGGTTTTTTTTGTTTGCAAGCAGCAGATTACGCGCA  
2 GAAAAAAGGATCTCAAGAAGATCCTTTGATCTTTTCTACGGGGTCTGACG  
3 CTCAGTGGAACGAAAACCTCACGTTAAGGGATTTTGGTCATGAGATTATCAA  
4 AAAGGATCTTCACCTAGATCCTTTTAAATTA AAAATGAAGTTTTAAATCAAT  
5 CTAAAGTATATATGAGTAAACTTGGTCTGACAGTTACCAATGCTTAATCAGT  
6 GAGGCACCTATCTCAGCGATCTGTCTATTTTCGTTCCATAGTTGCCTGAC  
7 TCCCCGTCGTGTAGATAACTACGATACGGGAGGGCTTACCATCTGGCCCCA  
8 GTGCTGCAATGATACCGCGAGACCCACGCTCACCGGCTCCAGATTTATCAG  
9 CAATAAACCAGCCAGCCGGAAGGGCCGAGCGCAGAAGTGGTCCTGCAACT  
10 TTATCCGCCTCCATCCAGTCTATTAATTGTTGCCGGGAAGCTAGAGTAAGTA  
11 GTTCGCCAGTTAATAGTTTGCGCAACGTTGTTGCCATTGCTACAGGCATCGT  
12 GGTGTCACGCTCGTCGTTTTGGTATGGCTTCATTCAGCTCCGGTTCCCAACG  
13 ATCAAGGCGAGTTACATGATCCCCATGTTGTGCAAAAAAGCGGTTAGCTC  
14 CTTCGGTCCTCCGATCGTTGTCAGAAGTAAGTTGGCCGCAGTGTTATCACT  
15 CATGGTTATGGCAGCACTGCATAATTCTCTTACTGTCATGCCATCCGTAAGAT  
16 GCTTTTCTGTGACTGGTGAGTACTCAACCAAGTCATTCTGAGAATAGTGTAT  
17 GCGGCGACCGAGTTGCTCTTGCCCGGCGTCAATACGGGATAATACCGCGCC  
18 ACATAGCAGA ACTTTAAAAGTGCTCATCATTGGAAAACGTTCTTCGGGGCG  
19 AAAACTCTCAAGGATCTTACCGCTGTTGAGATCCAGTTCGATGTAACCCAC  
20 TCGTGCACCCA ACTGATCTTCAGCATCTTTTACTTTACCAGCGTTTCTGGG  
21 TGAGCAAAAACAGGAAGGCAAAAATGCCGCAAAAAGGGAATAAGGGCGA  
22 CACGGAAATGTTGAATACTCATACTCTTCCTTTTTCAATATTATTGAAGCATT  
23 TATCAGGGTTATTGTCTCATGAGCGGATACATATTTGAATGTATTTAGAAAAA  
24 TAAACAAATAGGGGTTCGCGCACATTTCCCCGAAAAGTGCCACCTGACGT  
25 CTAAGAAACCATTATTATCATGACATTAACCTATAAAAATAGGCGTATCACG  
26 AGGCCCTTTCGTC

27

28

1 **5. Complete Sequence of pDsRed** (sequence of *rfp* marked on red background)

2 Available in the website: <http://www.biofeng.com/zaiti/dachang/pDsRed-Express2.html>

3

4 **From 5' to 3':**

5 AGCGCCCAATACGCAAACCGCCTCTCCCCGCGCGTTGGCCGATTCATTAAT  
6 GCAGCTGGCACGACAGGTTTCCCGACTGGAAAGCGGGCAGTGAGCGCAA  
7 CGCAATTAATGTGAGTTAGCTCACTCATTAGGCACCCCAGGCTTTACACTTT  
8 ATGCTTCCGGCTCGTATGTTGTGTGGAATTGTGAGCGGATAACAATTTACA  
9 CAGGAAACAGCTATGACCATGATTACGCCAAGCTTGCATGCCTGCAGGTCG  
10 ACTCTAGAGGATCCCCGGGTACCGGTCGCCACC **ATGGATAGCACTGAGAAC**  
11 **GTCATCAAGCCCTTCATGCGCTTCAAGGTGCACATGGAGGGCTCCGTGAAC**  
12 **GGCCACGAGTTCGAGATCGAGGGCGAGGGCGAGGGCAAGCCCTACGAGG**  
13 **GCACCCAGACCGCCAAGCTGCAGGTGACCAAGGGCGGCCCCCTGCCCTTC**  
14 **GCCTGGGACATCCTGTCCCCCAGTTCCAGTACGGCTCCAAGGTGTACGTG**  
15 **AAGCACCCCGCCGACATCCCCGACTACAAGAAGCTGTCTTCCCCGAGGG**  
16 **CTTCAAGTGGGAGCGCGTGATGAACTTCGAGGACGGCGGCGTGTTGACCG**  
17 **TGACCCAGGACTCCTCCCTGCAGGACGGCACCTTCATCTACCACGTGAAGT**  
18 **TCATCGGCGTGAACTTCCCCTCCGACGGCCCCGTAATGCAGAAGAAGACTC**  
19 **TGGGCTGGGAGCCCTCCACCGAGCGCTGTACCCCCGCGACGGCGTGCTG**  
20 **AAGGGCGAGATCCACAAGGCGCTGAAGCTGAAGGGCGGCGGCCACTACCT**  
21 **GGTGGAGTTCAAGTCAATCTACATGGCCAAGAAGCCCGTGAAGCTGCCCG**  
22 **GCTACTACTACGTGGACTCCAAGCTGGACATCACCTCCACAACGAGGACT**  
23 **ACACCGTGGTGGAGCAGTACGAGCGCGCCGAGGCCCGCCACCACCTGTTT**  
24 **CAGTAG**CGGCCGCGACTCTAGAATTCCAAGTGAAGCGCCGGTTCGCTACCATT  
25 ACCAACTTGTCTGGTGTCAAAAATAATAGGCCTACTAGTCGGCCGTACGGG  
26 CCCTTTCGTCTCGCGCGTTCGGTGTGACGGTGAAAACCTCTGACACATG  
27 CAGCTCCCGGAGACGGTACAGCTTGTCTGTAAGCGGATGCCGGGAGCAG  
28 ACAAGCCCGTCAGGGCGCGTACGCGGGTGTGGCGGGTGTCCGGGGCTGGC  
29 TTAATATGCGGCATCAGAGCAGATTGTACTGAGAGTGCACCATATGCGGT  
30 GTGAAATACCGCACAGATGCGTAAGGAGAAAATAACCGCATCAGGCGGCCTT  
31 AAGGGCCTCGTGATACGCCTATTTTTATAGGTTAATGTCATGATAATAATGGT  
32 TTCTTAGACGTCAGGTGGCACTTTTCGGGGAAATGTGCGCGGAACCCCTAT  
33 TTGTTTATTTTTCTAAATACATTCAAATATGTATCCGCTCATGAGACAATAAC  
34 CCTGATAAATGCTTCAATAATATTGAAAAGGAAGAGTATGAGTATTCAACA  
35 TTTCCGTGTCGCCCTTATCCCTTTTTTGCGGCATTTCCTTCCCTGTTTTTG  
36 CTCACCCAGAAACGCTGGTGAAAGTAAAAGATGCTGAAGATCAGTTGGGT  
37 GCACGAGTGGGTTACATCGAACTGGATCTCAACAGCGGTAAGATCCTTGAG  
38 AGTTTTCGCCCCGAAGAACGTTTTCCAATGATGAGCACTTTTAAAGTTCTG  
39 CTATGTGGCGCGGTATTATCCCGTATTGACGCCGGGCAAGAGCAACTCGGT  
40 CGCCGCATACACTATTCTCAGAATGACTTGGTTGAGTACTACCAGTCACA  
41 GAAAAGCATCTTACGGATGGCATGACAGTAAGAGAATTATGCAGTGCTGCC  
42 ATAACCATGAGTGATAACACTGCGGCCAACTTACTTCTGACAACGATCGGA  
43 GGACCGAAGGAGCTAACCGCTTTTTTGCACAACATGGGGGATCATGTAAC

1 CGCCTTGATCGTTGGGAACCGGAGCTGAATGAAGCCATACCAAACGACGA  
2 GCGTGACACCACGATGCCTGTAGCAATGGCAACAACGTTGCGCAAACCTATT  
3 AACTGGCGAACTACTTACTCTAGCTTCCCGGCAACAATTAATAGACTGGAT  
4 GGAGGCGGATAAAGTTGCAGGACCCTTCTGCGCTCGGCCCTTCCGGCTG  
5 GCTGGTTTATTGCTGATAAATCTGGAGCCGGTGAGCGTGGGTCTCGCGGTAT  
6 CATTGCAGCACTGGGGCCAGATGGTAAGCCCTCCCGTATCGTAGTTATCTAC  
7 ACGACGGGGAGTCAGGCAACTATGGATGAACGAAATAGACAGATCGCTGA  
8 GATAGGTGCCTCACTGATTAAGCATTGGTAACTGTCAGACCAAGTTTACTC  
9 ATATATACTTTAGATTGATTTAAACTTCATTTTTAATTTAAAAGGATCTAGGT  
10 GAAGATCCTTTTTGATAATCTCATGACCAAATCCCTAACGTGAGTTTTTCG  
11 TTCCACTGAGCGTCAGACCCCGTAGAAAAGATCAAAGGATCTTCTTGAGAT  
12 CCTTTTTTTCTGCGCGTAATCTGCTGCTTGCAAACAAAAAACCACCGCTA  
13 CCAGCGGTGGTTTGTGTTGCCGGATCAAGAGCTACCAACTCTTTTTCCGAAG  
14 GTAAGTGGCTTCAGCAGAGCGCAGATACCAAATACTGTTCTTCTAGTGTAG  
15 CCGTAGTTAGGCCACCACTTCAAGAACTCTGTAGCACCGCCTACATACCTC  
16 GCTCTGCTAATCCTGTTACCAGTGGCTGCTGCCAGTGGCGATAAGTCGTGT  
17 CTTACCGGGTTGGACTCAAGACGATAGTTACCGGATAAGGCGCAGCGGTTCG  
18 GGCTGAACGGGGGGTTCGTGCACACAGCCCAGCTTGGAGCGAACGACCTA  
19 CACCGAACTGAGATACCTACAGCGTGAGCTATGAGAAAGCGCCACGCTTCC  
20 CGAAGGGAGAAAGGCGGACAGGTATCCGGTAAGCGGCAGGGTCGGAACA  
21 GGAGAGCGCACGAGGGAGCTTCCAGGGGGAAACGCCTGGTATCTTTATAG  
22 TCCTGTGCGGGTTTCGCCACCTCTGACTTGAGCGTCGATTTTTGTGATGCTCG  
23 TCAGGGGGGCGGAGCCTATGGAAAACGCCAGCAACGCGGCCTTTTTACG  
24 GTTCCTGGCCTTTTGCTGGCCTTTTGCTCACATGTTCTTTCCTGCGTTATCCC  
25 CTGATTCTGTGGATAACCGTATTACCGCCTTTGAGTGAGCTGATACCGCTCG  
26 CCGCAGCCGAACGACCGAGCGCAGCGAGTCAGTGAGCGAGGAAGCGGAA  
27 G  
28  
29
